1 **Enzymes degraded under high light maintain proteostasis by transcriptional**  
2 **regulation in Arabidopsis**

3

4 Lei Li<sup>1,2\*</sup>, Owen Duncan<sup>2</sup>, Diep R Ganguly<sup>3,4</sup>, Chun Pong Lee<sup>2</sup>, Peter A. Crisp<sup>3,5</sup>, Akila  
5 Wijerathna-Yapa<sup>2</sup>, Karzan Salih<sup>2,6</sup>, Josua Trösch<sup>2</sup>, Barry J Pogson<sup>3</sup>, A. Harvey Millar<sup>2\*</sup>

6

7 1. Frontiers Science Center for Cell Responses, Department of Plant Biology and  
8 Ecology, College of Life Sciences, Nankai University, 300071 Tianjin, China.

9 2. ARC Centre of Excellence in Plant Energy Biology, School of Molecular Science,  
10 The University of Western Australia, 6009 Crawley, WA, Australia.

11 3. Australian Research Council Centre of Excellence in Plant Energy Biology,  
12 Research School of Biology, Australian National University Canberra, Acton ACT  
13 2601, Australia.

14 4. CSIRO Synthetic Biology Future Science Platform, CSIRO, Acton ACT, Australia.

15 5. School of Agriculture and Food Sciences, The University of Queensland, Brisbane  
16 QLD 4072, Australia.

17 6. Pharmaceutical Chemistry Department, Medical and Applied Science College,  
18 Charo University, 46023 Chamchamal-Sulaimani, Kurdistan Region, Iraq.

19

20 **\*Corresponding Authors**

21 Lei Li - lei.li@nankai.edu.cn; A. Harvey Millar - harvey.millar@uwa.edu.au

22

23 **Keywords**

24 Protein turnover, high light, protein homeostasis, transcription, translation

25

26

27 **Abstract**

28

29 Photo-inhibitory high light stress in *Arabidopsis* leads to increases in markers of protein  
30 degradation and transcriptional upregulation of proteases and proteolytic machinery,  
31 but proteostasis is largely maintained. We find significant increases in the *in vivo*  
32 degradation rate for specific molecular chaperones, nitrate reductase, glyceraldehyde-3  
33 phosphate dehydrogenase, and phosphoglycerate kinase and other plastid,  
34 mitochondrial, peroxisomal, and cytosolic enzymes involved in redox shuttles. Coupled  
35 analysis of protein degradation rates, mRNA levels, and protein abundance reveal that  
36 57% of the nuclear-encoded enzymes with higher degradation rates also had high light-  
37 induced transcriptional responses to maintain proteostasis. In contrast, plastid-encoded  
38 proteins with enhanced degradation rates showed decreased transcript abundances and  
39 must maintain protein abundance by other processes. This analysis reveals a light-  
40 induced transcriptional program for nuclear-encoded genes, beyond the regulation of  
41 PSII D1 subunit and the function of PSII, to replace key protein degradation targets in  
42 plants and ensure proteostasis under high light stress.

43

44 **Introduction**

45

46 Protein homeostasis (proteostasis) requires strictly controlled protein synthesis and  
47 degradation through coordinated gene expression, translational controls and protein  
48 degradation (Li et al., 2017; Millar et al., 2019). Protein turnover rates have been  
49 typically measured through a pulse-chase strategy by feeding plants or isolated  
50 organelles, radioactive precursors and monitoring the rates of appearance and  
51 disappearance of labelling (Sundby et al., 1993; Chotewutmontri and Barkan, 2020).  
52 The identification of PSII D1 subunit as the protein undergoing rapid turnover in  
53 chloroplasts, and the basis of photoinhibition under high light stress, was originally  
54 found using radioactive labelling of proteins in isolated chloroplasts (Ohad et al., 1984;  
55 Ohad et al., 1985; Sundby et al., 1993; Long et al., 1994). Using more recently  
56 developed discovery tools based on stable isotope labelling to measure turnover rates  
57 of many proteins, D1 was also noted as undergoing very rapid turnover in both  
58 Arabidopsis and barley, however these studies also identified other chloroplastic  
59 proteins being rapidly degraded under standard light conditions (Nelson et al., 2014b;  
60 Li et al., 2017). These studies have raised the prospect that a combination of direct or  
61 indirect photo-degradation targets may underlie photoinhibition and its consequences  
62 in plants (Li et al., 2018).

63

64 The degradation of soluble cytosolic proteins in plants typically occurs through the  
65 ubiquitin-proteasome pathway guided by selective ubiquitination of targeted proteins  
66 (Guo and Ecker, 2003). Plastids were commonly considered to be separated from this  
67 system by their membranes, thus relying on independent mechanisms of protein  
68 degradation (van Wijk and Kessler, 2017). However, recent research has uncovered an  
69 interconnection of these systems with specific plastid-localized proteins being tagged  
70 by ubiquitination to be degraded by the proteasome, a pathway termed Chloroplast-  
71 Associated Degradation (CHLORAD) (Ling et al., 2019). Chloroplasts damaged by UV  
72 exposure or over-accumulation of oxygen radicals are also degraded whole by globular  
73 vacuoles or by central vacuoles via selective autophagy (Woodson et al., 2015; Izumi  
74 et al., 2017). Specific protein degradation by selective autophagy has also been studied,  
75 but mainly for plastid stromal proteins such as RuBisCo (Michaeli et al., 2016). The  
76 proteolysis network inside chloroplasts works to differentially break down specific  
77 damaged proteins. CtpA and CtpA1 peptidase, CLP, DEG and FTSH family proteases  
78 have all been found or proposed, to play specialised roles in maturation, processing and  
79 cleavage of plastid-localized proteins (Gururani et al., 2015; van Wijk, 2015). As a  
80 consequence, there is ample opportunity for different rates of protein degradation to be  
81 initiated for specific plastid-localized proteins, which raises the question of how

82 proteostasis is controlled when specific proteolytic processes are initiated.

83

84 High throughput studies have revealed rapid and robust changes in the metabolome,  
85 transcriptome, and proteome in plants during light and dark transitions or high light  
86 stresses (Vogel et al., 2014; Liang et al., 2016; Crisp et al., 2017; Huang et al., 2019;  
87 Schuster et al., 2020). Such studies typically confirm the lack of positive correlations  
88 between changes in steady state mRNA and protein abundance, *i.e.* compared with the  
89 rapid and robust changes in mRNA, protein abundances are often very stable and  
90 statistically significant changes in abundance are rare.

91

92 Here, we use high light induced photoinhibition to trigger protein degradation and  
93 explore the relationship between protein degradation rate, transcriptional responses,  
94 and protein abundance for enzymes that participate in the metabolic response to high  
95 light. In so doing, we have found new direct or indirect targets of photodamage in plants  
96 and shed light on how transcriptional processes counteract protein degradation to mask  
97 light-response changes in the proteome and enable proteostasis.

98

99

## 100 **Results**

101

### 102 **High light leads to PSII photodamage and metabolic changes indicative of protein** 103 **degradation.**

104 To analyse protein homeostasis under light stress, we performed a high light treatment  
105 of Arabidopsis plants aimed at inducing photoinhibition in conditions we could  
106 subsequently use to rapidly label proteins for analysis. We used a modified whole-plant  
107 growth chamber system (Kolling et al., 2015) and replaced the plexiglass lid with glass  
108 to increase light transmittance from an external LED light source to an Arabidopsis  
109 rosette inside (**Fig 3A**). Light intensity was held at 100  $\mu$ E (standard light) or escalated  
110 to 500  $\mu$ E (high light), and fluorescence pulse-amplitude-modulation (PAM) was  
111 utilized to evaluate PSII associated photochemical parameters inside leaves (**Fig 1**).  
112 After an hour of high light exposure, PSII parameters including Y(II) and Y(NPQ)  
113 showed significant changes under high light compared to standard light conditions (**Fig**  
114 **1 A,B**) while Y(NO) remained steady under both light conditions (**Fig 1C**). This  
115 indicated 500  $\mu$ E exceeded the maximum capacity of PSII, thus requiring energy  
116 dissipation through non-photochemical quenching. Dark adaptation could rescue the  
117 maximum quantum yield of PSII (Fv/Fm) after an hour of high light exposure but failed  
118 to restore Fv/Fm after 2, 5 or 8 hours of high light exposure (**Fig 1D**). Heat can  
119 contribute to non-photochemical quenching, so we measured the leaf surface  
120 temperature using an infrared thermometer. We could not detect statistically significant

121 changes in leaf surface temperature on either the adaxial or abaxial leaf surface. The  
122 continuous room temperature air that was vented into the growth chamber during our  
123 measurements likely cooled the plant surface as shown in another recent high light  
124 stress study (Huang et al., 2019).

125

126 To measure the impact of photoinhibition of PSII on cellular metabolism, we measured  
127 amino acids, organic acids and sugar concentration in plants grown under standard and  
128 high light conditions (**Fig 1E, FigS1**). Six out of fourteen amino acids increased  
129 significantly ( $P < 0.05$ ) in abundance after high light treatment. Stress induced protein  
130 degradation products, including branched chain amino acids (Val, Leu and Ile) and  
131 aromatic amino acids (Phe, Trp and Tyr), were more abundant under high light. During  
132 plant stress, these protein degradation products serve as alternative respiratory  
133 substrates by being metabolized to D-2-hydroxyglutarate and 2-oxoglutarate (Araújo et  
134 al., 2011). Accordingly, both D-2-hydroxyglutarate and 2-oxoglutarate increased in  
135 abundance with high light treatment. These two metabolites are also known markers of  
136 high light dependent photorespiration (Kuhn et al., 2013). Aspartate abundance  
137 decreased significantly ( $P < 0.05$ ) after high light treatment (**FigS1**). However, threonine  
138 and methionine, which are biosynthesized from aspartate, and contribute to isoleucine  
139 biosynthesis (Hildebrandt et al., 2015), showed higher abundance after high light  
140 treatment. Sugars (sucrose, glucose, and fructose) and TCA cycle metabolites, other  
141 than 2-oxoglutarate, had comparable abundances over time between standard and high  
142 light conditions, with only citrate showing decreased abundance under high light.

143

#### 144 **High light responses in the transcriptome correlate poorly with proteomic changes.**

145 To investigate the wider cellular response, we assessed changes in the transcriptome  
146 and the proteome under high light. Arabidopsis plants were transferred into the afore  
147 mentioned growth chamber and left overnight to acclimate before plants were treated  
148 for 2, 5 and 8 hours in standard or high light conditions, then harvested for protein or  
149 RNA. Total RNA sequencing (RNA-seq) detected 18,575 transcripts (**DataS1**) and  
150 quantitative proteomic experiments measured 1,548 protein abundances (**DataS2**).

151

152 Two hours of high light treatment led to the up or down-regulation of several hundred  
153 genes in Arabidopsis shoots (**Fig 2A**). GO overrepresentation tests reveal enrichment  
154 of ontologies related to stress and unfolded protein responses (**DataS1**). By 5 h and 8 h  
155 of high light, there were several thousand differentially expressed genes (**Fig 2A**). GO  
156 overrepresentation tests showed upregulation of genes encoding protein involved in  
157 RNA metabolism, translational, and nucleotide synthesis. At 8 h, up-regulated  
158 enrichment was also evident for proteolysis, proteasome and cellular catabolic  
159 processes (**DataS1**). While high light appeared to directly affect chloroplast

160 fluorescence (**Fig 1**), transcriptional effects were mainly found in nuclear-encoded  
161 genes, with little evidence of changes in expression level of chloroplast encoded-genes  
162 (**Fig 2B**). Given the increase in amino acid abundances indicative of protein degradation  
163 (**Fig 1E**), and the GO enrichment analysis (**DataS1**), we further investigated the  
164 expression of nuclear-genes encoding proteases and proteolytic machinery. We  
165 identified 30 nuclear-encoded genes in this ontological group that were differentially  
166 expressed in response to high light, most only reached significance after 8 h of treatment  
167 (**Fig 2C**). Of these, all the genes encoding for chloroplast-localised proteases were  
168 upregulated.

169

170 To compare transcriptomic and proteomic responses, the abundance of proteins,  
171 measured across all samples, and their corresponding transcripts were extracted for  
172 PCA (**FigS2A,B**). While samples showed clustering by both time-point and light  
173 treatment based on transcript abundance, there was far less separation based on protein  
174 abundances. We also performed correlation analysis between the fold changes in protein  
175 and transcript abundance between high and standard light conditions (**FigS2 C-E**),  
176 which were found to be negligible (Pearson's  $r$ : T2 = 0.08, T5 = 0.04, and T8 = 0.03).

177

### 178 **Direct measurement of protein turnover rates by partial $^{13}\text{CO}_2$ labelling in** 179 **Arabidopsis.**

180 To determine if proteins were being degraded in response to high light but then replaced,  
181 we sought to isotopically label new proteins and thus allow degradation of pre-existing  
182 proteins to be tracked by mass spectrometry. While we have previously used  $^{15}\text{N}$   
183 labelling to assess protein degradation rates, the 4-6 h lag in this technique due to uptake  
184 by roots and translocation to leaves (Nelson et al., 2014b; Li et al., 2017) limited its  
185 utility to assess the impact of high light within 8 hours.  $^{13}\text{CO}_2$  fixation via  
186 photosynthesis is reported to allow rapid stable isotope incorporation in leaf amino  
187 acids and proteins (Ishihara et al., 2015; Ishihara et al., 2017). However, as the number  
188 of C atoms greatly exceeds N atoms in a tryptic peptide, the large mass shifts from  $^{13}\text{C}$   
189 labelling greatly increase the complexity of the resulting peptide mass spectra (Nelson  
190 et al., 2014a). To minimize this effect, we calculated that lowering the  $^{13}\text{C}$  incorporation  
191 rate into Arabidopsis plants by supplementing air with 50%  $^{13}\text{CO}_2$  at 400 ppm could  
192 allow peptide mass spectra to be more readily interpreted. To conduct  $^{13}\text{CO}_2$   
193 experiments, Arabidopsis plants were transferred into the growth chamber and left  
194 overnight to acclimate before labelling began in the morning. Arabidopsis plants were  
195 labelled for 2, 5 and 8 hours in standard or high light conditions, then harvested, and  
196 protein samples isolated and digested to measure isotopic incorporation and protein  
197 turnover rates. A representative mass spectrum of a tryptic peptide (ANLGMEVMHER)  
198 from a 2 hours sample shows the clear separation of the pre-existing peptide population

199 (a typical natural abundance  $^{13}\text{C}$  labelling pattern with 1, 2 or 3  $^{13}\text{C}$  atoms in the peptide)  
200 and a newly synthesized peptide population derived from the newly fixed  $^{13}\text{CO}_2$  ( $^{13}\text{C}$   
201 labelled pattern containing a median of 16  $^{13}\text{C}$  atoms in the peptide) (**Fig 3A**). The  
202 technique itself is robust against the influence of differences in enrichment level  
203 because it measures labelled proteins of different enrichments as a group (Nelson et al.,  
204 2014b; Li et al., 2017). However, to determine if such differences exist between the two  
205 light regimes, we determined the  $^{13}\text{C}$  carbon content of the amino acids in the labelled  
206 peptide populations as described previously (Nelson et al., 2014b; Li et al., 2017). There  
207 were no differences in  $^{13}\text{C}$  enrichment between standard and high light conditions over  
208 the time course *i.e.* 2, 5 and 8 hours (**FigS3**, median enrichment: Std-light: 29%, 25%  
209 and 30%; H-light 29%, 27% and 34%). Mass spectra derived from peptides from three  
210 well-known rapidly turned over proteins (D1, TH11 and PIFI) showed that the  $^{13}\text{C}$   
211 labelled peptide fraction (LPF) was one-third to one-half of the total peptide population  
212 under standard light conditions, indicating the rapid half-lives of these proteins (**Fig**  
213 **3B**). A two-fold higher LPF was detected for D1 peptides under high light compared  
214 with standard light. Calculations of protein turnover rates over the time course  
215 measured  $^{13}\text{C}$ -derived protein turnover rates for 202 proteins in standard light and 269  
216 proteins in high light (**DataS3**). The proteins measured had degradation rates ( $K_D$ ) of  
217 0.15 to 10 per day representing a half-life range from 1.6 hours to 5 days.

218

### 219 **High light leads to faster turnover of photosynthetic proteins and associated** 220 **enzymes in metabolic cascade reactions.**

221 Light stress can cause direct photodamage to D1 and change the turnover of proteins  
222 including D1 as well as other subunits of PSII and ATP synthase (Li et al., 2018;  
223 Chotewutmontri and Barkan, 2020). Using our  $^{13}\text{C}$ -derived protein turnover rates, we  
224 compared the difference in protein turnover rates between standard and high light  
225 conditions. This allows us to confirm expected, and discover new, direct targets of  
226 photodamage or proteins that are indirectly degraded under high light. Protein turnover  
227 rates of 140 proteins could be compared between two light conditions (**DataS4**).  
228 Compared to measurement under standard light conditions, 74 out of 140 proteins  
229 showed statistically significant changes in degradation rate under high light, 73 showed  
230 faster turnover, while one protein (protochlorophyllide oxidoreducase B-PORB,  
231 At4g27440) turned over more slowly. Placing the proteins with measured degradation  
232 rates in their functional, metabolic, and subcellular contexts shows the depth of impact  
233 that high light has on protein degradation rates in Arabidopsis rosettes (**Fig 4**). D1  
234 (PSBA) showed the fastest rate of degradation overall and a 3-fold increase in  
235 degradation rate under high light, while other PSII subunits, PSB28 and PSBP, showed  
236 lower median degradation rates but still a 2-3 fold increase in degradation rate under  
237 high light. ATP synthase subunits ( $\alpha$ ,  $\epsilon$  and b/b') also showed significantly faster

238 turnover under high light. A similar degree of degradation rate induction was seen for  
239 a series of molecular chaperones in the chloroplast and mitochondria, and also specific  
240 enzymes involved in the Calvin-Benson cycle (CBC) and glycolysis. All the major  
241 members of the malate dehydrogenase (MDH) family, which catalyze the malate shuttle  
242 between organelles, as well as thioredoxin and glutaredoxin linked enzymes in the  
243 chloroplast and mitochondria also degraded more rapidly under high light conditions.

244

245 Notably, there was no change in degradation rate of LHC-II, PSI, NDH or Cyt *b<sub>6</sub>f*  
246 subunits (**Fig 4, DataS4**). However, NIR1 and FTR, which take electrons from PSI Fd  
247 to reduce oxidized thioredoxin and nitrite, clearly degrade faster in high light. It was  
248 reported that reduced thioredoxin from FTR can serve as a reductant for activation of  
249 MDH and CBC, which links PSI Fd with metabolic enzymes in the chloroplast (Dai et  
250 al., 2000; Collin et al., 2003; Marri et al., 2009; Michelet et al., 2013; Guinea Diaz et  
251 al., 2020; Yu et al., 2020). Here we show that Trxm1 and Trxm4 turned over faster, as  
252 did chloroplast MDH and CBC enzymes, in response to high light. Furthermore, faster  
253 turnover of malate shuttles linked metabolic enzymes were observed. There was a faster  
254 turnover of MTHFR1, ATMS1 and BCAT4 in the cytosol that catalyse the reductive  
255 conversion of 5,10-methylenetetrahydrofolate (CH<sub>2</sub>-THF) to 5-methyltetrahydrofolate  
256 (CH<sub>3</sub>-THF), which then serves as a methyl donor for methionine biosynthesis and the  
257 following chain elongation pathway. In mitochondria, SHMT1, which catalyses the  
258 production of serine from glycine, degraded faster under high light. A number of  
259 enzymes involved in the consumption of NADPH, NADH, ATP, and glutathione also  
260 show faster degradation rates (**Fig 4, DataS4**). Examples of this group include PORC,  
261 which catalyses the conversion of protochlorophyllide to chlorophyllide, and  
262 geranylgeranyl (GG) chlorophyll a reductase-GGR, which catalyse the formation of  
263 chlorophyll *a* in the thylakoid membrane; cytosolic NDPK1 and mitochondrial NDPK3  
264 that catalyses the production of nucleotides by consuming ATP; cytosolic  
265 NADPH:Quinone Reductase-NQR that converts quinone to semiquinone; and Gpx2,  
266 GsTU19, GrxS15 and Lactoyl-GS lyase that reduce oxidative metabolites by  
267 consuming glutathione. Taken together, we can see a clear pattern of faster turnover of  
268 enzymes involved in metabolic reactions responding to high light.

269

270 Beyond metabolic enzymes, faster degradation was also observed for a number of  
271 elongation factors, chaperonins, and proteases in response to high light (**Fig 4, DataS4**).  
272 Proteins in this group are essential for protein synthesis, folding, assembly, and  
273 degradation to maintain proteostasis. This group includes RNA binding proteins  
274 (CSP41B and RBPs) and elongation factors (EF-P/G, RPS1, SCO1 and RAB1b) in  
275 the chloroplast; cpHSP70 and HSP93-V (ClpC) that are involved in chloroplast protein  
276 import (Nakai, 2018); and ClpC that forms a protein complex with CLP protease to



277 unfold selected proteins for degradation (van Wijk, 2015; Nakai, 2018); chloroplast  
278 CPN20 and CPN60 that form a protein complex for the assembly of RuBisCo (Aigner  
279 et al., 2017; Vitlin Gruber and Feiz, 2018); mitochondrial chaperonin CPN10 and  
280 mtHsc70-1 involved in electron transport chain protein complex assembly (Wei et al.,  
281 2019); and FtsH2 that forms a protein complex with FtsH1/5/8 and is involved in D1  
282 degradation (Zaltsman et al., 2005; Nishimura et al., 2016).

283

### 284 **Transcriptional responses counteract increased protein turnover to maintain** 285 **proteostasis of many major cellular enzymes**

286 To further examine the 74 proteins exhibiting light-induced changes in degradation rate,  
287 we performed fuzzy k-mean clustering based on their changes in degradation rate and  
288 transcript abundance (**Fig 5A, DataS5**). This approach grouped the 74 proteins into  
289 three clusters. Proteins in clusters 1 and 3 had the same change in degradation rate,  
290 however, cluster 1 genes were up-regulated by high light whereas those in cluster 2  
291 were down-regulated. Cluster 3 contained proteins with greater changes in degradation  
292 rate whose encoding genes were firstly up-regulated and then down-regulated by high  
293 light.

294

295 A total of 41 out of the 74 light-induced degradation set were chloroplast-localized  
296 proteins (**DataS5**). To further investigate the coordination between protein turnover,  
297 and RNA and protein abundance in the chloroplast, we aligned the changes ( $\log_2$  fold-  
298 change) in these traits between standard and high light conditions, then ranked them by  
299 functional categories in the three clusters (**Fig 5B**). In contrast to their faster turnover  
300 in response to high light treatment, chloroplast protein abundance for these proteins  
301 remained unchanged. We only found FtsH2 protease, RNA binding protein-At1g09340,  
302 and NIR1 that showed statistically significant abundance decreases after 2 or 5 hours  
303 of high light treatment (**Fig 5B**). PSII subunit PSBP even showed a statistically  
304 significant increase in abundance after 8 hours. This indicated proteostasis of fast  
305 turnover chloroplast proteins is maintained even after high light treatment for 8 hours.  
306 Transcriptional up-regulation for the genes encoding proteins in Cluster 1 and 3 masked  
307 their faster turnover, thus maintaining protein levels. Cluster 2 consisted of eight  
308 proteins, with half of them being encoded by the chloroplast genome. All chloroplast  
309 encoded proteins with measured turnover in this study, namely PSII D1, ATP synthase  
310 subunits ( $\alpha$  and  $\epsilon$ ), and RuBisCo large subunit follow the Cluster 2 pattern (**Fig 5B**).  
311 Expression of these chloroplast-encoded genes are not induced by high light stress  
312 treatment, so their proteostasis in the face of increased protein degradation rates must  
313 be governed by post-transcriptional process.

314

315 To investigate the timing of coordination between transcription and proteostasis for

316 chloroplast proteins, we plotted RNA and protein abundance changes by members in  
317 each cluster (**Fig 5C-D**). Consistently, smaller net changes were observed in protein  
318 abundance (statistical grouping A-C) than RNA abundance (statistical grouping A-E).  
319 Net protein abundances started to decrease after 2 hours of high light exposure.  
320 However, protein abundance for Cluster 1 and 3 started to recover while the abundance  
321 of members of Cluster 2 continued decreasing over the time course of high light  
322 treatment. It is evident that Cluster 1 and 3 complemented their faster protein turnover  
323 through enhanced transcription. A higher level of transcripts permitted continued  
324 protein translational to counteract light-induced protein degradation. In contrast,  
325 Cluster 2 were more inclined to drop in both transcription and protein abundance after  
326 high light treatment. Their proteostasis is likely to be recovered more slowly through  
327 post-transcriptional responses involving translational control.

328

## 329 **Discussion**

### 330 **A multi-omics analysis reveals new targets of light-dependent protein degradation**

331 It is well known that high light stress causes damage to the PSII reaction centre protein,  
332 D1, and leads to impaired PSII efficiency. In this study, we found high light tripled the  
333 degradation rate of D1 with a concomitant drop in PSII efficiency [Y(II)] (**Fig 1**,  
334 **DataS4**). We observed that although Y(II) dropped at the beginning of the high light  
335 treatment it gradually recovered to the level observed under standard light over the first  
336 hour of high light exposure (**Fig 1A**). This suggests Arabidopsis plants can cope with  
337 the increased turnover rate of D1 under high light by maintaining proteostasis and PSII  
338 function after a short time course of high light exposure. Consistent with this, a recent  
339 study utilizing ribosomal profiling and pulse labelling found that D1 photodamage can  
340 trigger recruitment of its mRNA to the ribosome to enhance D1 synthesis  
341 (Chotewutmontri and Barkan, 2020). This demonstrates that D1 degradation and  
342 synthesis are matched to maintain proteostasis for short-term high light acclimation.  
343 However, we found that Fv/Fm, an indicator of PSII maximum efficiency after dark  
344 adaption, declined after longer high light exposure. This suggests that longer periods of  
345 high light caused irreversible damage, from which Arabidopsis PSII efficiency cannot  
346 recover even after dark adaptation, likely due to the uncoupling of D1 degradation from  
347 its synthesis rate (**Fig 5**).

348

349 Beyond the D1 protein, we found high light significantly increased the degradation of  
350 another seventy-two proteins (**DataS4**). Protein degradation in our high light  
351 experiments is supported by our measures of the accumulation of amino acids through  
352 protein degradation (**Fig 1, FigS1**) and up-regulation of protease gene expression (**Fig**  
353 **2**). To investigate how Arabidopsis coped with this enhanced degradation to maintain  
354 proteostasis, we investigated changes in transcript abundances between standard and

355 high light conditions (**Fig 2,5**). Nuclear-encoded genes encoding proteins with high  
356 turnover rates (clusters 1 and 3) demonstrated transcriptional responses that masked  
357 protein turnover changes, resulting in proteostasis under high light (**Fig 5 A-C**). These  
358 strong correlations between faster protein turnover and higher transcript abundances  
359 help explain the purpose of high light triggered transcript induction without apparent  
360 protein abundance changes.

361

362 In contrast, chloroplast encoded genes (D1, Rubisco large subunit, and ATP synthase  
363 subunits) do not respond to high light at the transcriptional level, and their RNA levels  
364 even dropped to some extent. This limited transcription response in the chloroplast  
365 under light stress was also reported in tobacco (Schuster et al., 2020). It appears that  
366 chloroplast-encoded genes largely rely on post-transcriptional controls to counteract  
367 rapid protein turnover under high light. Previous studies focusing on *in vitro* or *in vivo*  
368 chloroplast translation observed translation elongation rate stimulated by light  
369 (Muhlbauer and Eichacker, 1998; Trebitsh and Danon, 2001; Chotewutmontri and  
370 Barkan, 2016; Chotewutmontri and Barkan, 2020). The activation of protein synthesis  
371 by elongation is also supported by faster turnover of different RNA binding proteins  
372 and elongation factors in this study (**Fig 4**). For short-term high light exposure, rapid  
373 protein synthesis from translation elongation can complement rapid protein degradation  
374 due to photodamage to maintain proteostasis. However, we found chloroplast  
375 translation failed to keep pace with protein degradation after a longer periods of high  
376 light exposure. This is supported by the failure of dark adaptation to recover PSII (**Fig**  
377 **1D**) and the tendency towards protein abundance decreases after a longer high light  
378 exposure (**Fig 5D**). Recently, a salvaging strategy to circumvent inefficient chloroplast  
379 translation by expressing D1 protein from the nuclear genome was found to enhance  
380 Arabidopsis, tobacco and rice performance under stress conditions (Chen et al., 2020).  
381 It would be attractive to perform a wider salvaging operation involving other  
382 photodamage targets discovered in this study to maintain their proteostasis under high  
383 light or other stresses.

384

### 385 **Many fast turnover proteins are unaffected by high light**

386 We found that high light does not affect turnover rates for nearly half of the 140 proteins  
387 that we could assess between standard and high light conditions (**DataS4**). Some of  
388 these are rapidly turnover proteins such as PIFI (Post-Illumination Chlorophyll  
389 Fluorescence Increase) and CCD4 (Carotenoid Cleavage Dioxygenase 4). PIFI is an  
390 ancillary subunit of the chloroplast NDH complex, and we previously proposed PIFI's  
391 rapid turnover could relate to the putative role of the NDH complex in photoprotection  
392 (Li et al., 2017; Li et al., 2018). But our high light data suggests the control of PIFI  
393 turnover is independent of light stress. CCD4 is a plastoglobuli-localized enzyme that

394 cleaves carotenoids, such as  $\beta$ -carotene (Gonzalez-Jorge et al., 2013; van Wijk and  
395 Kessler, 2017). Its degradation was proposed to associate with a plastoglobuli M48  
396 peptidase PGM48 (Bhuiyan et al., 2016). *In silico* modelling of CCD4 suggests it has  
397 lower stability compared with other members of the CCD gene family (Priya et al.,  
398 2017). Its rapid turnover may reflect its suborganelle location, which is distinct to the  
399 other CCDs or this modelled intrinsic lower stability rather than light stress. Rapid  
400 degradation of other proteins, such as CML10, THI1, GRP2, BAM3, show only small  
401 rate changes in high light. It is probable, at least for these proteins, that their rapid  
402 turnover rates are due to their function, sequence, protein domains, or cellular location  
403 rather than light stress (Li et al., 2017).

404

405 We also observed that the rapidly turning over enzyme, protochlorophyllide  
406 oxidoreductase (PORB) exhibited a significant slowing of its degradation rate under  
407 high light (**Fig 4**). Protochlorophyllide oxidoreductase is a light-activated enzyme,  
408 which catalyzes the transformation of protochlorophyllide to chlorophyllide. In barley  
409 and rice, there are two isoforms of protochlorophyllide oxidoreductases whose  
410 expression are regulated differently by normal and high light (Holtorf et al., 1995;  
411 Lebedev and Timko, 1999; Sakuraba et al., 2013). In Arabidopsis, there are three  
412 protochlorophyllide oxidoreductases namely PORA, PORB and PORC (Gabruk and  
413 Mysliwa-Kurdziel, 2015). Repression of Arabidopsis PORB gene expression by light  
414 has been reported (Hoecker and Quail, 2001; Matsumoto et al., 2004). In this study, we  
415 also found *PORB* gene expression is repressed after high light treatment. In contrast,  
416 PORC showed faster protein turnover in high light and slightly induced gene expression.  
417 It is conceivable that PORC plays a specific role in chlorophyll biogenesis under high  
418 light conditions. For PORB and PORC, transcription plays a key role in maintaining  
419 proteostasis, and their protein turnover rates appear to be responsive to changes in  
420 transcript abundance.

421

#### 422 **Metabolic explanation of increased protein turnover rates.**

423 The turnover of D1 is typically explained as a response to photo-inactivation of the  
424 protein. Research suggests that photodamage to PSII may involve the disintegration of  
425 the  $Mn^{2+}$  centre in PSII that leads to an energy imbalance and, a so far ill-defined  
426 oxidative damage of residues in D1. Loss of D1 impairs PSII function and leads to  
427 cleavage of the damaged D1 subunit by proteases in a two-step model (Kato et al.,  
428 2015). Turnover of another rapidly degrading protein, thiamin synthase (THI1), is  
429 explained by its suicide mechanism that means the enzyme has a single catalytic cycle  
430 before it is inactivated and needs to be replaced (Chatterjee et al., 2011; Joshi et al.,  
431 2020). Recently we showed across a wide range of enzymes in Arabidopsis, yeast and  
432 bacteria, that the number of catalytic cycles until replacement varied according to the

433 chemical risk of the reaction they undertook, including enzymes with photoactivatable  
434 substrates or with reactive oxygen producing roles in metabolism (Hanson et al., 2021).  
435 It is evident from our protein turnover measurements that high light leads to faster  
436 degradation of PSII D1, PSB28, PSBP, PORC and GGR, which all catalyse light  
437 activated reactions (**Fig 4, DataS4**). PSI was also activated by high light, yet seemingly  
438 its rate of protein degradation was unaffected. FTR and NIR1, which take electrons  
439 from PSI Fd to reduce thioredoxin and nitrite, turned over faster. Thioredoxins can serve  
440 as reductants to activate CBC and MDH catalyst activities (Nikkanen and Rintamaki,  
441 2019). Moreover, transient overproduction of NADPH and ATP as substrates may  
442 further accelerate the usage of CBC and MDH enzymes, and also accelerate their  
443 turnover. MDH activation in the chloroplast acts as a stimulus to malate circulation to  
444 the cytosol, mitochondrion, and peroxisome in so-called malate shuttles of reductant  
445 from sites of synthesis to cellular sinks (Selinski and Scheibe, 2019). In terms of risk,  
446 high light and photoinhibition is likely to lead to increased ROS production and an  
447 elevated need for shuttling of reductant out of the plastid to other cellular compartments.  
448 The increased turnover of redox shuttling systems, namely glutathione and thioredoxin  
449 linked systems and the MDH enzymes involved in malate shuttles throughout the cell  
450 (**Fig 4**), may be due to increased flux through these pathways and thus a consequence  
451 of an increased rate of wear-out damage of these enzymes (Hanson et al., 2021;  
452 Tivendale et al., 2021).

453

## 454 **Conclusion**

455 We have discovered a range of proteins with enhanced rates of degradation in response  
456 to high light. Light-activated electron transport pathways and metabolic fluxes likely  
457 stimulate the usage of metabolic enzymes and accelerate their degradation. Potential  
458 protein targets of photodamage, many of which are chloroplast-localized, have been  
459 revealed, and a differential role of nuclear and plastid transcriptional control to maintain  
460 proteostasis has been highlighted.

461

462

## 463 **Methods**

464 *Arabidopsis plants preparation and <sup>13</sup>C<sub>2</sub> labelling*

465 *Arabidopsis thaliana* accession Columbia-0 plants were grown under 16/8-h light/dark  
466 conditions with cool white T8 tubular fluorescent lamps 4000K 3350 lm (Osram,  
467 Germany) with the intensity of 100–125  $\mu\text{mol m}^{-2} \text{s}^{-1}$  at 22 °C. *Arabidopsis* plants were  
468 grown in soil pots for 21 days until they reached leaf production stage 1.10 (Boyes et  
469 al., 2001). Shoots of *Arabidopsis* at the leaf production stage 1.10 were positioned into  
470 the sealed growth chamber with the soil pots kept underneath (**Fig 3**). Six tandem  
471 growth chambers were supplied with air at a continuous flow rate 6 L/min and kept

472 overnight before the labelling experiment ( $T_0$ ). A homemade water column was  
473 connected to the air hose to keep the air humidity inside the growth chamber. A  
474 commercial LED (Heliospectra) was used as the light source for the labelling  
475 experiment, and the light spectra was set as (420nm-250, 450nm-638, 530nm-750,  
476 630nm-1000, 660nm-250 and 735nm-25). Normal and high light intensity at 100 and  
477 500  $\mu\text{E}$  was achieved by adjusting the distance between the growth chamber and the  
478 light source.  $^{13}\text{CO}_2$  labelling was started at dawn by supplying the growth chamber with  
479 a mixture of  $\text{CO}_2$  air and  $^{13}\text{CO}_2$  air at equal volume a continuous flow rate 6 L/min. The  
480 Arabidopsis plants were labelled for 2, 5 and 8 hours ( $T_2$ ,  $T_5$  and  $T_8$ ) before their shoots  
481 cut and snap-frozen in liquid nitrogen to stop all biological activities immediately.  
482 Three biological replicates were collected at each time point.

483

484 *Protein extraction, in-gel/solution digestion, high pH HPLC separation and LC-MS*  
485 *analysis of tryptic peptides*

486 The shoot samples (~0.1 g) were snap-frozen in liquid nitrogen and homogenized using  
487 Qiagen tissue lysis beads (2 mm). A total plant protein extraction kit (PE0230-1KT,  
488 Sigma Chemicals) was used to extract total proteins. The final pellet of total protein  
489 was dissolved in Solution 4 and then reduced and alkylated by tributylphosphine (TBP)  
490 and iodoacetamide (IAA) as described in the Sigma manual. The suspension was  
491 centrifuged at 16,000 g for 30 min, and the supernatant was assayed for protein  
492 concentration by amido black quantification as described previously (Li et al., 2012).  
493 Protein (100  $\mu\text{g}$ ) in solution from each sample was then mixed with an equal volume of  
494 2 $\times$ sample buffer (4% SDS, 125 mM Tris, 20% glycerol, 0.005% Bromophenol blue and  
495 10% mercaptoethanol, pH6.8) before being separated on a Biorad protean II  
496 electrophoresis system with a 4% (v/v) polyacrylamide stacking gel and 12% (v/v)  
497 polyacrylamide separation gel. Proteins were visualized by colloidal Coomassie  
498 Brilliant Blue G250 staining. One gel lane from one single biological replicate was  
499 excised into 11 fractions. Gel lanes from ten samples ( $T_0$  as a control, three biological  
500 replicates for  $^{13}\text{C}$  labelled sample at each time point) were fractioned into 110 and in-  
501 gel digested as described previously (Li et al., 2017). For protein abundance  
502 measurements, total proteins (50  $\mu\text{g}$ ) from  $^{14}\text{N}$  grown plant were combined with the  
503 fully  $^{15}\text{N}$  labelled protein reference (50  $\mu\text{g}$ ), and then in-solution trypsin digested. Each  
504 sample was separated into 96 fractions by high pH HPLC separation and further pooled  
505 into 6 fractions. Twenty-one total protein samples (Three biological samples from  $T_0$ ;  
506 2, 5 and 8 under both standard and high light conditions kept in the same growth  
507 chamber as  $^{13}\text{C}$  labelling) were in-solution digested and separated into 126 fractions.  
508 Tryptic peptides from in-gel/in-solution digested were lyophilized in a Labconco  
509 centrifugal vacuum concentrator. Lyophilized samples were first resuspended in  
510 loading buffer (5% ACN, 0.0% FA) and filtered through 0.22  $\mu\text{m}$  Millipore column

511 before being run in an Orbitrap Fusion (Thermo Fisher Scientific) mass spectrometer  
512 over the course of 95 mins over 2–30% (v/v) acetonitrile in 0.1% (v/v) formic acid  
513 (Dionex UltiMate 3000) on a 250 × 0.075 mm column (Dr. Maisch Repronil-PUR 1.9  
514 mm).

515

#### 516 *Mass spectrometry data analysis*

517 Orbitrap fusion raw (.raw) files were first converted to mzML using the Msconvert  
518 package from the Proteowizard project, and mzML files were subsequently converted  
519 to Mascot generic files (.mgf) using the mzxml2 search tool from the TPP. Mascot  
520 generic file peak lists were searched against an in-house *Arabidopsis* database  
521 comprising ATH1.pep (release 10) from The *Arabidopsis* Information Resource (TAIR)  
522 and the *Arabidopsis* mitochondrial and plastid protein sets (33621 sequences; 13487170  
523 residues) (Lamesch et al., 2012), using the Mascot search engine version 2.3 and  
524 utilizing error tolerances of 10 ppm for MS and 0.5 Da for MS/MS; “Max Missed  
525 Cleavages” set to 1; variable modifications of oxidation (Met) and carbamidomethyl  
526 (Cys). All mzML files and dat files are provided in ProteomeXchange. We used  
527 iProphet and ProteinProphet from the Trans Proteomic Pipeline (TPP) to analyze  
528 peptide and protein probability and global false discovery rate (FDR) (Nesvizhskii et  
529 al., 2003; Deutsch et al., 2010; Shteynberg et al., 2011). The reported peptide lists with  
530  $p=0.8$  have FDRs of <3%, and protein lists with  $p=0.95$  have FDRs of <0.5%.  
531 Quantification of LPFs ( $^{13}\text{C}$  labeled protein fraction) and protein abundance ( $^{14}\text{N}/^{15}\text{N}$   
532 ratios) were accomplished by an in-house script written in R as described previously  
533 (Nelson et al., 2014b; Li et al., 2017; Salih et al., 2020). Mass spectrometry data can be  
534 accessed through Proteomexchange through two entries: protein abundance changes in  
535 response to high light treatment (PXD010888), Protein turnover rates under high light  
536 treatment (PXD010889).

537

#### 538 *Total RNA-sequencing*

539 *Arabidopsis* plants were grown under identical conditions as per the  $^{13}\text{C}$  labelling  
540 experiment, except that normal air was supplied to the growth chamber. Shoot tissues  
541 were harvested (as above) in biological triplicate after differing light transitions from  
542 dark: T0D - end of night (dark control), T2H - 2 hours high light, T2L - 2 hours standard  
543 light, T5H - 5 hours high light, T5L - 5 hours standard light, T8H - 8 hours high light,  
544 and T8L - 8 hours standard light. Total RNA was isolated using TRI reagent based on  
545 an adapted protocol (Crisp et al., 2017). Full details are available at protocols.io:  
546 [dx.doi.org/10.17504/protocols.io.bt8wnrxe](https://dx.doi.org/10.17504/protocols.io.bt8wnrxe). Total RNA-sequencing libraries were  
547 prepared using the TruSeq Stranded Total RNA with Ribo-Zero Plant kit (RS-122-2402,  
548 Illumina, CA, USA) as per manufacturer’s instructions but with input RNA and reaction  
549 volumes adjusted by one-third. PCR amplified libraries were pooled equal-molar and

550 sequenced (75 bp, single-end) on one lane of the NextSeq500.

551

552 Raw read quality was first diagnosed using FastQC (v0.11.7). Trim Galore! (v0.4.4)  
553 was used for adapter and low-quality read trimming with PHRED score < 20 (-q 20).  
554 Trimmed reads were input for single-end splice-aware alignments using Subjunc from  
555 the Subread package v1.5.0 (Liao et al., 2013), retaining only reads that uniquely  
556 aligned to the Arabidopsis TAIR10 reference genome. Uniquely aligned reads were  
557 sorted and indexed using Samtools v1.3.1 (Li et al., 2009). Aligned reads were  
558 summarised to gene-level loci using the Araport11 annotation (Cheng et al., 2017) using  
559 featureCounts (-s 2 for reverse stranded libraries) (Liao et al., 2014)). Differential gene  
560 expression was tested using the edgeR quasi-likelihood pipeline (Robinson and Oshlack,  
561 2010; Chen et al., 2016). Reads mapping to ribosomal RNA were removed; only loci  
562 containing counts per million (CPM) > 1 in at least three samples were examined. The  
563 trimmed mean of M-values (TMM) method was used for library normalisation to  
564 account for sequencing depth and composition (Robinson and Oshlack, 2010).  
565 Generalized linear models were fitted using normalized counts to estimate dispersion  
566 (glmQLFit) followed by employing quasi-likelihood F-tests (glmQLFTest) to test for  
567 differential expression while controlling for false discovery rates due to multiple  
568 hypothesis testing (FDR adjusted p-value < 0.05). Protein subcellular localisation data  
569 was acquired from SUBA (Hooper et al., 2017).

570

571 RNA-seq data is summarized in **DataS1** and can be accessed at GEO repository  
572 GSE131545: <https://www.ncbi.nlm.nih.gov/geo/query/acc.cgi?acc=GSE131545>. Code  
573 used for analyses are available on GitHub: <https://github.com/dtrain16/NGS-scripts>.

574

575 *PSII fluorescence parameters measured by mini-PAM and IMAGING-PAM*

576 The Arabidopsis plants grown under the same condition for labelling experiment were  
577 used for PSII fluorescence parameters measurements except that normal air was  
578 supplied to the growth chamber. After darkness adaption at least 20 mins, PSII  
579 parameters of T<sub>0</sub> plants were measured using LED as the light source at 100 and 500  
580  $\mu$ E light intensity with a mini-PAM (Heinz Walz GmbH). F<sub>o</sub>/F values were measured  
581 every 1min for 1hour. Y(II), Y(NPQ), and Y(NO) values were calculated with the  
582 WinControl-3.25 data acquisition software. For F<sub>v</sub>/F<sub>m</sub> measurements, T<sub>0</sub> and T<sub>1</sub>, T<sub>2</sub>,  
583 T<sub>5</sub>, and T<sub>8</sub> plants light exposed at 100 and 500  $\mu$ E were darkness adapted at least 20  
584 mins before being measured by a MAXI version of the IMAGING-PAM (Heinz Walz  
585 GmbH). A color gradient was used to demonstrate the F<sub>v</sub>/F<sub>m</sub> (maximum quantum yield  
586 of PSII) values measured by IMAGING-PAM in leaves of the whole rosette. One  
587 biological replicate was a combination of measured F<sub>v</sub>/F<sub>m</sub> values in three leaves in  
588 Arabidopsis plants.



589

### 590 *Metabolite Extraction*

591 The Arabidopsis plants grown under the same condition for labelling experiment were  
592 used for metabolite extraction except that normal air was supplied to the growth  
593 chamber. Plant tissues (15–50 mg) were collected at specified time points and  
594 immediately snap-frozen in liquid nitrogen. Samples were ground to fine powder and  
595 500 µl of cold metabolite extraction solution (90% [v/v] methanol, spiked with 2 mg/ml  
596 ribitol, 6 mg/ml adipic acid, and 2 mg/ml and <sup>13</sup>C-leucine as internal standards).  
597 Samples were immediately vortexed and shaken at 1,400 rpm for 20 min at 75°C. Cell  
598 debris was removed by centrifugation at 20,000 x g for 5 minutes. For each sample, 100  
599 or 400 µl of supernatant was transferred to a new tube and either proceeded to  
600 derivatization for LC-MS analysis or dried using a SpeedVac.

601

### 602 *Analyses of organic acids and amino acids by selective reaction monitoring using triple* 603 *quadrupole (QQQ) mass spectrometry*

604 For LC-MS analysis of organic acids, sample derivatization was carried out based on  
605 previously published methods with modifications (Han et al., 2013). Briefly, for each  
606 of 100 µL of sample, 50 µL of 250 mM 3-nitrophenylhydrazine in 50% methanol, 50  
607 µL of 150 mM 1-ethyl-3-(3-dimethylaminopropyl) carbodiimide in methanol, and 50  
608 µL of 7.5% pyridine in 75% methanol were mixed and allowed to react on ice for 60  
609 minutes. To terminate the reaction, 50 µL of 2 mg/mL butylated-hydroxytoluene in  
610 methanol was added, followed by the addition of 700 µL of water. Derivatized organic  
611 acids were separated on a Phenomenex Kinetex XB-C18 column (50 x 2.1mm, 5µm  
612 particle size) using 0.1% formic acid in water (solvent A) and methanol with 0.1%  
613 formic acid (solvent B) as the mobile phase. The elution gradient was 18% B at 1 min,  
614 90% B at 10 min, 100% B at 11 min, 100% B at 12 min, 18% B at 13 min and 18% B  
615 at 20 min. The column flow rate was 0.3 mL/min and the column temperature was  
616 maintained at 40 °C. The QQQ-MS was operated in the negative ion mode with multiple  
617 reaction monitoring (MRM) mode.

618

619

### 620 **Acknowledgements**

621 Jacob Petereit and Sandra Kebler are thanked for advice on plant growth conditions and  
622 lighting the chamber with LEDs. We acknowledge the Biomolecular Resource Facility  
623 at the ANU for assistance with Illumina sequencing and computational resources  
624 provided by the National Computational Infrastructure, which is supported by the  
625 Australian Government. Mass spectrometry was performed on instruments managed by  
626 the WA Proteomics Facility as a node of Proteomics Australia and was supported by  
627 infrastructure funding from the Western Australian State Government in partnership

628 with Bioplatforms Australia under the Commonwealth Government National  
629 Collaborative Research Infrastructure Strategy

630

### 631 **AUTHOR CONTRIBUTION**

632 LL, BP, AHM designed the research; LL, KS and AWY performed plant growth and  
633 plant physiological parameter measurements; DRG and PAC performed RNA-  
634 sequencing. Mass spectrometry proteomics and analysis was performed by LL and OD.  
635 CPL performed metabolites extraction and mass spectrometry analysis. LL and AHM  
636 wrote the manuscript. All authors contribute to the writing and revision of the article.

637

### 638 **FUNDING**

639 This work was supported through funding by the Australian Research Council  
640 (CE140100008, FL200100057) to AHM and BP, National Natural Science Foundation  
641 of China (31970294) and Tianjin NSF (19JCYBJC24100) to LL, CSIRO Synthetic  
642 Biology Future Science Platform to DRG.

643

### 644 **COMPETING INTERESTS**

645 The authors declare that there are no competing interests associated with the manuscript.

646

647 **Figure Legend**

648 **Fig 1 High light induced changes in photochemical responses and metabolite**  
649 **abundances in Arabidopsis.**

650 Arabidopsis in a growth chamber (**Fig 1 A**) were dark-adapted for at least 20 mins  
651 before being exposed to 100, and 500  $\mu\text{E}$  LED light. Chlorophyll fluorescence  
652 measurements were transformed to three parameters that describe the fate of excitation  
653 energy in PS II, including Y(II)-quantum yields of photochemical energy conversion  
654 in PSII (**A**), Y(NPQ)-quantum yields of regulated non-photochemical energy loss in  
655 PSII (**B**) and Y(NO)-quantum yields of non-regulated non-photochemical energy loss  
656 in PSII (**C**). Arabidopsis plants were exposed to 100 and 500  $\mu\text{E}$  LED light for 1,2,5  
657 and 8 hours before their Fv/Fm values were determined by maxi-PAM (**D**). Specific  
658 amino acids (QQQ) and organic acids (Q-TOF) that increased in abundance in  
659 response to high light treatment (**E**). Error bars show standard deviations for  
660 photochemical parameters measurements (biological replicates n=4) and standard  
661 errors for metabolites measurements (biological replicates n=3). Statistical  
662 significance tests were performed with a student's t test (\*\*P<0.01, \* P<0.05).

663

664 **Fig 2. High light induced changes to the transcriptome in Arabidopsis shoots.**

665 Gene expression differences were induced by high light treatment of Arabidopsis shoot  
666 tissue. (**A**) Numbers of differentially expressed genes (adjusted p-value < 0.05) at 2 h,  
667 5 h and 8 h of high light treatment. (**B**) Volcano plots of differential gene expression  
668 (horizontal red line denotes adjusted p-value < 0.05) of nuclear vs chloroplast-encoded  
669 genes at 2 h, 5 h and 8 h of high light treatment. Red and blue dots denote up- and  
670 down-regulated genes, respectively (**C**) Differential expression of genes encoding  
671 proteases and components of the proteolytic machinery, notably proteases in plastids  
672 (colored green).

673

674 **Fig 3 Measurement protein turnover rates in Arabidopsis shoots by partial  $^{13}\text{C}$**   
675 **labelling of the proteome.**

676 (**A**) Air containing  $^{13}\text{C}$  was supplied at the end of night to a sealed growth chamber  
677 with a transparent glass lid allowing efficient light entry. Total proteins extracted from  
678 labelled shoots were analyzed by peptide mass spectrometry. A representative mass  
679 spectrum of one peptide from labelled shoot shows the natural abundance (NA)  
680 population and the new peptide synthesised using  $^{13}\text{C}$  labelled amino acids. (**B**) The  
681 mass spectra and calculated percentage labelled peptide fraction (LPF) for peptides  
682 derived from PSBA (D1;ATCG00020), THI1 (AT5G54770) and PIFI (AT3G15840)  
683 after 2, 5 and 8 hours of  $^{13}\text{C}$  labelling are shown. The natural abundance (NA)  
684 population is coloured light green and the newly synthesized peptide population is  
685 coloured dark green in each case.

686

687 **Fig 4 Changes in protein turnover rates in response to high light treatment.**

688 Changes in protein degradation rate were shown as log<sub>2</sub> fold changes between high and  
689 standard light. For visualization, sixty-one proteins with annotated functions and  
690 localize in four major cellular compartments *i.e.* chloroplast, cytosol, mitochondrion

691 and peroxisome were extracted from the set of 74 proteins with significant changes in  
692 rate. Protein subunits in photosynthetic complexes, import apparatus, chaperonin and  
693 protease were coloured according to the values of log<sub>2</sub> fold changes (**Data S4**). Protein  
694 subunits with non-significant changes or non-available data were coloured grey.

695

696 **Fig 5 Changes in transcript and protein abundance for proteins with significant**  
697 **changes in protein turnover rate during high light treatment.**

698 Based on patterns of protein degradation and transcript changes, a fuzzy k-mean  
699 clustering method was utilized to cluster the 74 proteins with significant changes in  
700 protein turnover rate. Representative curves of the three clusters were plotted (**A**) and  
701 values of distance to centroid for specific proteins is provided in **Data S5**. Forty-one  
702 plastid proteins were extracted from the whole set to show their protein turnover rate  
703 alongside fold changes in transcript and protein abundance (**B**). Boxplots of changes in  
704 transcript (**C**) and protein abundance (**D**) of each cluster over the time course are shown.  
705 PTO; change in protein turnover rate.

706

### 707 Supplemental Figures

708

709 **Fig S1 High light induced changes in abundance of specific amino acids and**  
710 **organic acids.**

711 Specific amino acids (measured by LC-QQQ MS) and organic acids (measured by LC-  
712 Q-TOF MS) that increase in abundance in response to high light treatment. Error bars  
713 show standard errors (biological replicates n=3). Statistical significance tests were  
714 performed with a student's t test (\*\*P<0.01, \* P<0.05, ^ P<0.1).

715

716 **Fig S2 Principal components analysis and correlations of protein and mRNA**  
717 **abundance showing the relationship between transcriptional responses and**  
718 **protein abundance in standard light and high light conditions.**

719 PCA analysis for 370 proteins with measured transcript abundance (**DataS1**) and  
720 protein abundance (**DataS2**) in the dark (black), standard (blue), and high light (yellow)  
721 conditions. Scatterplots display the relationship between log<sub>2</sub> fold-change in protein  
722 abundance (x-axis) and mRNA abundance (y-axis), in response to high light. Pearson's  
723 *r* was calculated to quantify their correlation at 2h (T2), 5h (T5) and 8h (T8) (**C-E**).

724

725 **Fig S3 <sup>13</sup>C enrichment level of the heavy labelled <sup>13</sup>C peptide population under**  
726 **standard (blue) and high light (yellow) conditions.**

727 The calculated <sup>13</sup>C enrichment level for all peptides identified under each condition  
728 from the progressive labelling experiments combined. In each histogram, the bars are  
729 the actual peptide number, the median and standard deviation are shown as a plotted  
730 red line normal distribution (norm). The number of unique peptides (pep) included in  
731 each analysis is shown.

732

733

734 **Supplemental Data**

735

736 **DataS1:** High light transcriptome analysis.

737

738 **DataS2:** High light proteome analysis.

739

740 **DataS3:** Protein turnover rates by  $^{13}\text{C}$  labelling in high and standard light.

741

742 **DataS4:** Comparison of protein turnover rates in standard and high light conditions.

743

744 **DataS5:** Changes in transcript and protein abundance of proteins with differences in  
745 protein turnover rate.

746

747

748 **Reference**

- 749 **Aigner, H., Wilson, R.H., Bracher, A., Calisse, L., Bhat, J.Y., Hartl, F.U., and**  
750 **Hayer-Hartl, M.** (2017). Plant RuBisCo assembly in *E. coli* with five  
751 chloroplast chaperones including BSD2. *Science* **358**, 1272-1278.
- 752 **Araújo, W.L., Tohge, T., Ishizaki, K., Leaver, C.J., and Fernie, A.R.** (2011).  
753 Protein degradation – an alternative respiratory substrate for stressed plants.  
754 *Trends Plant Sci.*
- 755 **Bhuiyan, N.H., Friso, G., Rowland, E., Majsec, K., and van Wijk, K.J.** (2016).  
756 The Plastoglobule-Localized Metallopeptidase PGM48 Is a Positive Regulator  
757 of Senescence in *Arabidopsis thaliana*. *Plant Cell* **28**, 3020-3037.
- 758 **Boyes, D.C., Zayed, A.M., Ascenzi, R., McCaskill, A.J., Hoffman, N.E., Davis,**  
759 **K.R., and Gorch, J.** (2001). Growth stage-based phenotypic analysis of  
760 *Arabidopsis*: a model for high throughput functional genomics in plants. *Plant*  
761 *Cell* **13**, 1499-1510.
- 762 **Chatterjee, A., Abeydeera, N.D., Bale, S., Pai, P.J., Dorrestein, P.C., Russell,**  
763 **D.H., Ealick, S.E., and Begley, T.P.** (2011). *Saccharomyces cerevisiae* THI4p  
764 is a suicide thiamine thiazole synthase. *Nature* **478**, 542-546.
- 765 **Chen, J.-H., Chen, S.-T., He, N.-Y., Wang, Q.-L., Zhao, Y., Gao, W., and Guo, F.-**  
766 **Q.** (2020). Nuclear-encoded synthesis of the D1 subunit of photosystem II  
767 increases photosynthetic efficiency and crop yield. *Nature Plants* **6**, 570-580.
- 768 **Chen, Y., Lun, A.T., and Smyth, G.K.** (2016). From reads to genes to pathways:  
769 differential expression analysis of RNA-Seq experiments using Rsubread and  
770 the edgeR quasi-likelihood pipeline. *F1000Res* **5**, 1438.
- 771 **Cheng, C.Y., Krishnakumar, V., Chan, A.P., Thibaud-Nissen, F., Schobel, S., and**  
772 **Town, C.D.** (2017). Araport11: a complete reannotation of the *Arabidopsis*  
773 *thaliana* reference genome. *Plant J* **89**, 789-804.
- 774 **Chotewutmontri, P., and Barkan, A.** (2016). Dynamics of Chloroplast Translation  
775 during Chloroplast Differentiation in Maize. *PLoS Genet* **12**, e1006106.
- 776 **Chotewutmontri, P., and Barkan, A.** (2020). Light-induced psbA translation in plants  
777 is triggered by photosystem II damage via an assembly-linked autoregulatory  
778 circuit. *Proceedings of the National Academy of Sciences* **117**, 21775-21784.
- 779 **Collin, V., Issakidis-Bourguet, E., Marchand, C., Hirasawa, M., Lancelin, J.M.,**  
780 **Knaff, D.B., and Miginiac-Maslow, M.** (2003). The *Arabidopsis* plastidial  
781 thioredoxins: new functions and new insights into specificity. *The Journal of*  
782 *biological chemistry* **278**, 23747-23752.
- 783 **Crisp, P.A., Ganguly, D.R., Smith, A.B., Murray, K.D., Estavillo, G.M., Searle, I.,**  
784 **Ford, E., Bogdanovic, O., Lister, R., Borevitz, J.O., Eichten, S.R., and**  
785 **Pogson, B.J.** (2017). Rapid Recovery Gene Downregulation during Excess-  
786 Light Stress and Recovery in *Arabidopsis*. *Plant Cell* **29**, 1836-1863.
- 787 **Dai, S., Schwendtmayer, C., Schurmann, P., Ramaswamy, S., and Eklund, H.**  
788 (2000). Redox signaling in chloroplasts: cleavage of disulfides by an iron-  
789 sulfur cluster. *Science* **287**, 655-658.
- 790 **Deutsch, E.W., Mendoza, L., Shteynberg, D., Farrah, T., Lam, H., Tasman, N.,**  
791 **Sun, Z., Nilsson, E., Pratt, B., Prazen, B., Eng, J.K., Martin, D.B.,**

- 792 **Nesvizhskii, A.I., and Aebersold, R.** (2010). A guided tour of the Trans-  
793 Proteomic Pipeline. *Proteomics* **10**, 1150-1159.
- 794 **Gabruk, M., and Mysliwa-Kurdziel, B.** (2015). Light-Dependent  
795 Protochlorophyllide Oxidoreductase: Phylogeny, Regulation, and Catalytic  
796 Properties. *Biochemistry* **54**, 5255-5262.
- 797 **Gonzalez-Jorge, S., Ha, S.-H., Magallanes-Lundback, M., Gilliland, L.U., Zhou,**  
798 **A., Lipka, A.E., Nguyen, Y.-N., Angelovici, R., Lin, H., Cepela, J., Little,**  
799 **H., Buell, C.R., Gore, M.A., and DellaPenna, D.** (2013). CAROTENOID  
800 CLEAVAGE DIOXYGENASE4 Is a Negative Regulator of  $\beta$ -Carotene  
801 Content in Arabidopsis Seeds. *The Plant Cell* **25**, 4812-4826.
- 802 **Guinea Diaz, M., Nikkanen, L., Himanen, K., Toivola, J., and Rintamäki, E.**  
803 (2020). Two chloroplast thioredoxin systems differentially modulate  
804 photosynthesis in Arabidopsis depending on light intensity and leaf age. *The*  
805 *Plant Journal* **104**, 718-734.
- 806 **Guo, H., and Ecker, J.R.** (2003). Plant responses to ethylene gas are mediated by  
807 SCF(EBF1/EBF2)-dependent proteolysis of EIN3 transcription factor. *Cell*  
808 **115**, 667-677.
- 809 **Gururani, M.A., Venkatesh, J., and Tran, L.S.** (2015). Regulation of  
810 Photosynthesis during Abiotic Stress-Induced Photoinhibition. *Mol Plant* **8**,  
811 1304-1320.
- 812 **Han, J., Gagnon, S., Eckle, T., and Borchers, C.H.** (2013). Metabolomic analysis of  
813 key central carbon metabolism carboxylic acids as their 3-  
814 nitrophenylhydrazones by UPLC/ESI-MS. *Electrophoresis* **34**, 2891-2900.
- 815 **Hanson, A.D., McCarty, D.R., Henry, C.S., Xian, X., Joshi, J., Patterson, J.A.,**  
816 **Garcia-Garcia, J.D., Fleischmann, S.D., Tivendale, N.D., and Millar, A.H.**  
817 (2021). The number of catalytic cycles in an enzyme's lifetime and why it  
818 matters to metabolic engineering. *Proc Natl Acad Sci U S A* **118**.
- 819 **Hildebrandt, T.M., Nunes Nesi, A., Araujo, W.L., and Braun, H.P.** (2015). Amino  
820 Acid Catabolism in Plants. *Mol Plant* **8**, 1563-1579.
- 821 **Hoecker, U., and Quail, P.H.** (2001). The phytochrome A-specific signaling  
822 intermediate SPA1 interacts directly with COP1, a constitutive repressor of  
823 light signaling in Arabidopsis. *The Journal of biological chemistry* **276**,  
824 38173-38178.
- 825 **Holtorf, H., Reinbothe, S., Reinbothe, C., Bereza, B., and Apel, K.** (1995). Two  
826 routes of chlorophyllide synthesis that are differentially regulated by light in  
827 barley (*Hordeum vulgare* L.). *Proc Natl Acad Sci U S A* **92**, 3254-3258.
- 828 **Hooper, C.M., Castleden, I.R., Tanz, S.K., Aryamanesh, N., and Millar, A.H.**  
829 (2017). SUBA4: the interactive data analysis centre for Arabidopsis  
830 subcellular protein locations. *Nucleic Acids Res* **45**, D1064-D1074.
- 831 **Huang, J., Zhao, X., and Chory, J.** (2019). The Arabidopsis Transcriptome  
832 Responds Specifically and Dynamically to High Light Stress. *Cell Reports* **29**,  
833 4186-4199.e4183.
- 834 **Ishihara, H., Obata, T., Sulpice, R., Fernie, A.R., and Stitt, M.** (2015). Quantifying  
835 Protein Synthesis and Degradation in Arabidopsis by Dynamic  $^{13}\text{CO}_2$

- 836 Labeling and Analysis of Enrichment in Individual Amino Acids in Their Free  
837 Pools and in Protein. *Plant Physiol* **168**, 74-93.
- 838 **Ishihara, H., Moraes, T.A., Pyl, E.T., Schulze, W.X., Obata, T., Scheffel, A.,**  
839 **Fernie, A.R., Sulpice, R., and Stitt, M.** (2017). Growth rate correlates  
840 negatively with protein turnover in Arabidopsis accessions. *Plant J* **91**, 416-  
841 429.
- 842 **Izumi, M., Ishida, H., Nakamura, S., and Hidema, J.** (2017). Entire Photodamaged  
843 Chloroplasts Are Transported to the Central Vacuole by Autophagy. *Plant Cell*  
844 **29**, 377-394.
- 845 **Joshi, J., Beaudoin, G.A.W., Patterson, J.A., Garcia-Garcia, J.D., Belisle, C.E.,**  
846 **Chang, L.Y., Li, L., Duncan, O., Millar, A.H., and Hanson, A.D.** (2020).  
847 Bioinformatic and experimental evidence for suicidal and catalytic plant  
848 THI4s. *Biochem J* **477**, 2055-2069.
- 849 **Kato, Y., Ozawa, S., Takahashi, Y., and Sakamoto, W.** (2015). D1 fragmentation in  
850 photosystem II repair caused by photo-damage of a two-step model.  
851 *Photosynth Res* **126**, 409-416.
- 852 **Kolling, K., George, G.M., Kunzli, R., Flutsch, P., and Zeeman, S.C.** (2015). A  
853 whole-plant chamber system for parallel gas exchange measurements of  
854 Arabidopsis and other herbaceous species. *Plant Methods* **11**, 48.
- 855 **Kuhn, A., Engqvist, M.K.M., Jansen, E.E.W., Weber, A.P.M., Jakobs, C.,**  
856 **Maurino, V.G., and Rennenberg, H.** (2013). D-2-hydroxyglutarate  
857 metabolism is linked to photorespiration in the *shm1-1* mutant. *Plant Biology*  
858 **15**, 776-784.
- 859 **Lamesch, P., Berardini, T.Z., Li, D., Swarbreck, D., Wilks, C., Sasidharan, R.,**  
860 **Muller, R., Dreher, K., Alexander, D.L., Garcia-Hernandez, M.,**  
861 **Karthikeyan, A.S., Lee, C.H., Nelson, W.D., Ploetz, L., Singh, S., Wensel,**  
862 **A., and Huala, E.** (2012). The Arabidopsis Information Resource (TAIR):  
863 improved gene annotation and new tools. *Nucleic acids research* **40**, D1202-  
864 1210.
- 865 **Lebedev, N., and Timko, M.P.** (1999). Protochlorophyllide oxidoreductase B-  
866 catalyzed protochlorophyllide photoreduction in vitro: insight into the  
867 mechanism of chlorophyll formation in light-adapted plants. *Proc Natl Acad*  
868 *Sci U S A* **96**, 9954-9959.
- 869 **Li, H., Handsaker, B., Wysoker, A., Fennell, T., Ruan, J., Homer, N., Marth, G.,**  
870 **Abecasis, G., Durbin, R., and Genome Project Data Processing, S.** (2009).  
871 The Sequence Alignment/Map format and SAMtools. *Bioinformatics* **25**,  
872 2078-2079.
- 873 **Li, L., Aro, E.M., and Millar, A.H.** (2018). Mechanisms of Photodamage and Protein  
874 Turnover in Photoinhibition. *Trends in plant science* **23**, 667-676.
- 875 **Li, L., Nelson, C.J., Solheim, C., Whelan, J., and Millar, A.H.** (2012). Determining  
876 degradation and synthesis rates of arabidopsis proteins using the kinetics of  
877 progressive <sup>15</sup>N labeling of two-dimensional gel-separated protein spots.  
878 *Molecular & cellular proteomics : MCP* **11**, M111 010025.
- 879 **Li, L., Nelson, C.J., Trosch, J., Castleden, I., Huang, S., and Millar, A.H.** (2017).



- 880 Protein Degradation Rate in Arabidopsis thaliana Leaf Growth and  
881 Development. *Plant Cell* **29**, 207-228.
- 882 **Liang, C., Cheng, S.F., Zhang, Y.J., Sun, Y.Z., Fernie, A.R., Kang, K.,**  
883 **Panagiotou, G., Lo, C., and Lim, B.L.** (2016). Transcriptomic, proteomic  
884 and metabolic changes in Arabidopsis thaliana leaves after the onset of  
885 illumination. *Bmc Plant Biol* **16**.
- 886 **Liao, Y., Smyth, G.K., and Shi, W.** (2013). The Subread aligner: fast, accurate and  
887 scalable read mapping by seed-and-vote. *Nucleic Acids Res* **41**, e108.
- 888 **Liao, Y., Smyth, G.K., and Shi, W.** (2014). featureCounts: an efficient general  
889 purpose program for assigning sequence reads to genomic features.  
890 *Bioinformatics* **30**, 923-930.
- 891 **Ling, Q., Broad, W., Trösch, R., Töpel, M., Demiral Sert, T., Lymperopoulos, P.,**  
892 **Baldwin, A., and Jarvis, R.P.** (2019). Ubiquitin-dependent chloroplast-  
893 associated protein degradation in plants. *Science* **363**.
- 894 **Long, S.P., Humphries, S., and Falkowski, P.G.** (1994). Photoinhibition of  
895 Photosynthesis in Nature. *Annu Rev Plant Phys* **45**, 633-662.
- 896 **Marri, L., Zaffagnini, M., Collin, V., Issakidis-Bourguet, E., Lemaire, S.D.,**  
897 **Pupillo, P., Sparla, F., Miginiac-Maslow, M., and Trost, P.** (2009). Prompt  
898 and Easy Activation by Specific Thioredoxins of Calvin Cycle Enzymes of  
899 Arabidopsis thaliana Associated in the GAPDH/CP12/PRK Supramolecular  
900 Complex. *Molecular Plant* **2**, 259-269.
- 901 **Matsumoto, F., Obayashi, T., Sasaki-Sekimoto, Y., Ohta, H., Takamiya, K., and**  
902 **Masuda, T.** (2004). Gene expression profiling of the tetrapyrrole metabolic  
903 pathway in Arabidopsis with a mini-array system. *Plant Physiol* **135**, 2379-  
904 2391.
- 905 **Michaeli, S., Galili, G., Genschik, P., Fernie, A.R., and Avin-Wittenberg, T.**  
906 (2016). Autophagy in Plants - What's New on the Menu? *Trends Plant Sci* **21**,  
907 134-144.
- 908 **Michelet, L., Zaffagnini, M., Morisse, S., Sparla, F., Perez-Perez, M.E., Francia,**  
909 **F., Danon, A., Marchand, C.H., Fermani, S., Trost, P., and Lemaire, S.D.**  
910 (2013). Redox regulation of the Calvin-Benson cycle: something old,  
911 something new. *Front Plant Sci* **4**, 470.
- 912 **Millar, A.H., Heazlewood, J.L., Giglione, C., Holdsworth, M.J., Bachmair, A.,**  
913 **and Schulze, W.X.** (2019). The Scope, Functions, and Dynamics of  
914 Posttranslational Protein Modifications. *Annu Rev Plant Biol* **70**, 119-151.
- 915 **Muhlbauer, S.K., and Eichacker, L.A.** (1998). Light-dependent formation of the  
916 photosynthetic proton gradient regulates translation elongation in chloroplasts.  
917 *The Journal of biological chemistry* **273**, 20935-20940.
- 918 **Nakai, M.** (2018). New Perspectives on Chloroplast Protein Import. *Plant and Cell*  
919 *Physiology* **59**, 1111-1119.
- 920 **Nelson, C.J., Li, L., and Millar, A.H.** (2014a). Quantitative analysis of protein  
921 turnover in plants. *Proteomics* **14**, 579-592.
- 922 **Nelson, C.J., Alexova, R., Jacoby, R.P., and Millar, A.H.** (2014b). Proteins with  
923 high turnover rate in barley leaves estimated by proteome analysis combined

- 924 with in planta isotope labeling. *Plant Physiol* **166**, 91-108.
- 925 **Nesvizhskii, A.I., Keller, A., Kolker, E., and Aebersold, R.** (2003). A statistical  
926 model for identifying proteins by tandem mass spectrometry. *Anal Chem* **75**,  
927 4646-4658.
- 928 **Nikkanen, L., and Rintamaki, E.** (2019). Chloroplast thioredoxin systems  
929 dynamically regulate photosynthesis in plants. *Biochem J* **476**, 1159-1172.
- 930 **Nishimura, K., Kato, Y., and Sakamoto, W.** (2016). Chloroplast Proteases: Updates  
931 on Proteolysis within and across Suborganelle Compartments. *Plant Physiol*  
932 **171**, 2280-2293.
- 933 **Ohad, I., Kyle, D.J., and Arntzen, C.J.** (1984). Membrane protein damage and  
934 repair: removal and replacement of inactivated 32-kilodalton polypeptides in  
935 chloroplast membranes. *J Cell Biol* **99**, 481-485.
- 936 **Ohad, I., Kyle, D.J., and Hirschberg, J.** (1985). Light-dependent degradation of the  
937 Q(B)-protein in isolated pea thylakoids. *EMBO J* **4**, 1655-1659.
- 938 **Priya, R., Sneha, P., Rivera Madrid, R., Doss, C.G.P., Singh, P., and Siva, R.**  
939 (2017). Molecular Modeling and Dynamic Simulation of Arabidopsis Thaliana  
940 Carotenoid Cleavage Dioxygenase Gene: A Comparison with *Bixa orellana*  
941 and *Crocus Sativus*. *Journal of Cellular Biochemistry* **118**, 2712-2721.
- 942 **Robinson, M.D., and Oshlack, A.** (2010). A scaling normalization method for  
943 differential expression analysis of RNA-seq data. *Genome Biol* **11**, R25.
- 944 **Sakuraba, Y., Rahman, M.L., Cho, S.-H., Kim, Y.-S., Koh, H.-J., Yoo, S.-C., and**  
945 **Paek, N.-C.** (2013). The ricefaded green leaf locus encodes  
946 protochlorophyllide oxidoreductase B and is essential for chlorophyll  
947 synthesis under high light conditions. *The Plant Journal* **74**, 122-133.
- 948 **Salih, K.J., Duncan, O., Li, L., O'Leary, B., Fenske, R., Trosch, J., and Millar,**  
949 **A.H.** (2020). Impact of oxidative stress on the function, abundance, and  
950 turnover of the Arabidopsis 80S cytosolic ribosome. *Plant J* **103**, 128-139.
- 951 **Schuster, M., Gao, Y., Schottler, M.A., Bock, R., and Zoschke, R.** (2020). Limited  
952 Responsiveness of Chloroplast Gene Expression during Acclimation to High  
953 Light in Tobacco. *Plant Physiol* **182**, 424-435.
- 954 **Selinski, J., and Scheibe, R.** (2019). Malate valves: old shuttles with new  
955 perspectives. *Plant Biol (Stuttg)* **21 Suppl 1**, 21-30.
- 956 **Shteynberg, D., Deutsch, E.W., Lam, H., Eng, J.K., Sun, Z., Tasman, N.,**  
957 **Mendoza, L., Moritz, R.L., Aebersold, R., and Nesvizhskii, A.I.** (2011).  
958 iProphet: multi-level integrative analysis of shotgun proteomic data improves  
959 peptide and protein identification rates and error estimates. *Molecular &*  
960 *cellular proteomics* : MCP **10**, M111 007690.
- 961 **Sundby, C., Mccaffery, S., and Anderson, J.M.** (1993). Turnover of the  
962 Photosystem-II D1-Protein in Higher-Plants under Photoinhibitory and  
963 Nonphotoinhibitory Irradiance. *Journal of Biological Chemistry* **268**, 25476-  
964 25482.
- 965 **Tivendale, N.D., Fenske, R., Duncan, O., and Millar, A.H.** (2021). In vivo  
966 homopropargylglycine incorporation enables sampling, isolation and  
967 characterization of nascent proteins from Arabidopsis thaliana. *Plant J.*

- 968 **Trebitsh, T., and Danon, A.** (2001). Translation of chloroplast psbA mRNA is  
969 regulated by signals initiated by both photosystems II and I. *Proc Natl Acad*  
970 *Sci U S A* **98**, 12289-12294.
- 971 **van Wijk, K.J.** (2015). Protein maturation and proteolysis in plant plastids,  
972 mitochondria, and peroxisomes. *Annu Rev Plant Biol* **66**, 75-111.
- 973 **van Wijk, K.J., and Kessler, F.** (2017). Plastoglobuli: Plastid Microcompartments  
974 with Integrated Functions in Metabolism, Plastid Developmental Transitions,  
975 and Environmental Adaptation. *Annual Review of Plant Biology* **68**, 253-289.
- 976 **Vitlin Gruber, A., and Feiz, L.** (2018). Rubisco Assembly in the Chloroplast. *Front*  
977 *Mol Biosci* **5**, 24.
- 978 **Vogel, M.O., Moore, M., Konig, K., Pecher, P., Alsharafa, K., Lee, J., and Dietz,**  
979 **K.J.** (2014). Fast retrograde signaling in response to high light involves  
980 metabolite export, MITOGEN-ACTIVATED PROTEIN KINASE6, and  
981 AP2/ERF transcription factors in Arabidopsis. *Plant Cell* **26**, 1151-1165.
- 982 **Wei, S.S., Niu, W.T., Zhai, X.T., Liang, W.Q., Xu, M., Fan, X., Lv, T.T., Xu, W.Y.,**  
983 **Bai, J.T., Jia, N., and Li, B.** (2019). Arabidopsis mtHSC70-1 plays important  
984 roles in the establishment of COX-dependent respiration and redox  
985 homeostasis. *J Exp Bot* **70**, 5575-5590.
- 986 **Woodson, J.D., Joens, M.S., Sinson, A.B., Gilkerson, J., Salome, P.A., Weigel, D.,**  
987 **Fitzpatrick, J.A., and Chory, J.** (2015). Ubiquitin facilitates a quality-control  
988 pathway that removes damaged chloroplasts. *Science* **350**, 450-454.
- 989 **Yu, J., Li, Y., Qin, Z., Guo, S., Li, Y., Miao, Y., Song, C., Chen, S., and Dai, S.**  
990 (2020). Plant Chloroplast Stress Response: Insights from Thiol Redox  
991 Proteomics. *Antioxid Redox Signal* **33**, 35-57.
- 992 **Zaltsman, A., Feder, A., and Adam, Z.** (2005). Developmental and light effects on  
993 the accumulation of FtsH protease in Arabidopsis chloroplasts--implications  
994 for thylakoid formation and photosystem II maintenance. *Plant J* **42**, 609-617.
- 995

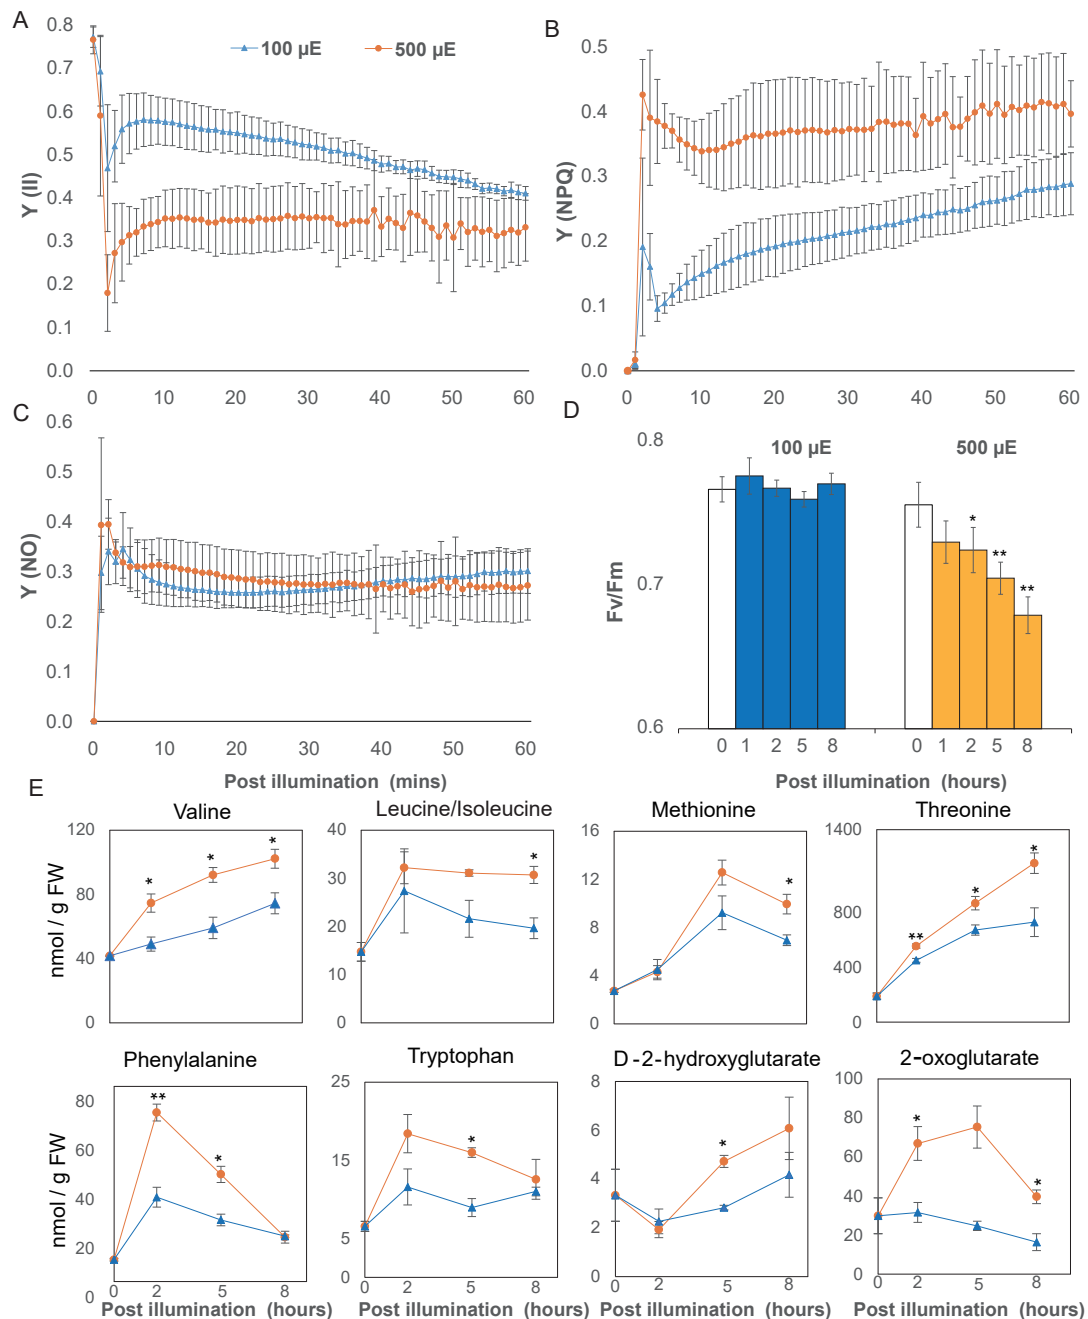

**Fig 1 High light induced changes in photochemical responses and metabolite abundances in Arabidopsis.**

Arabidopsis in a growth chamber (Fig 1 A) were dark-adapted for at least 20 mins before being exposed to 100, and 500  $\mu$ E LED light. Chlorophyll fluorescence measurements were transformed to three parameters that describe the fate of excitation energy in PS II, including Y(II)-quantum yields of photochemical energy conversion in PSII (A), Y(NPQ)-quantum yields of regulated non-photochemical energy loss in PSII (B) and Y(NO)-quantum yields of non-regulated non-photochemical energy loss in PSII (C). Arabidopsis plants were exposed to 100 and 500  $\mu$ E LED light for 1,2,5 and 8 hours before their Fv/Fm values were determined by maxi-PAM (D). Specific amino acids (QQQ) and organic acids (Q-TOF) that increased in abundance in response to high light treatment (E). Error bars show standard deviations for photochemical parameters measurements (biological replicates n=4) and standard errors for metabolites measurements (biological replicates n=3). Statistical significance tests were performed with a student's t test (\*\*P<0.01, \* P<0.05).

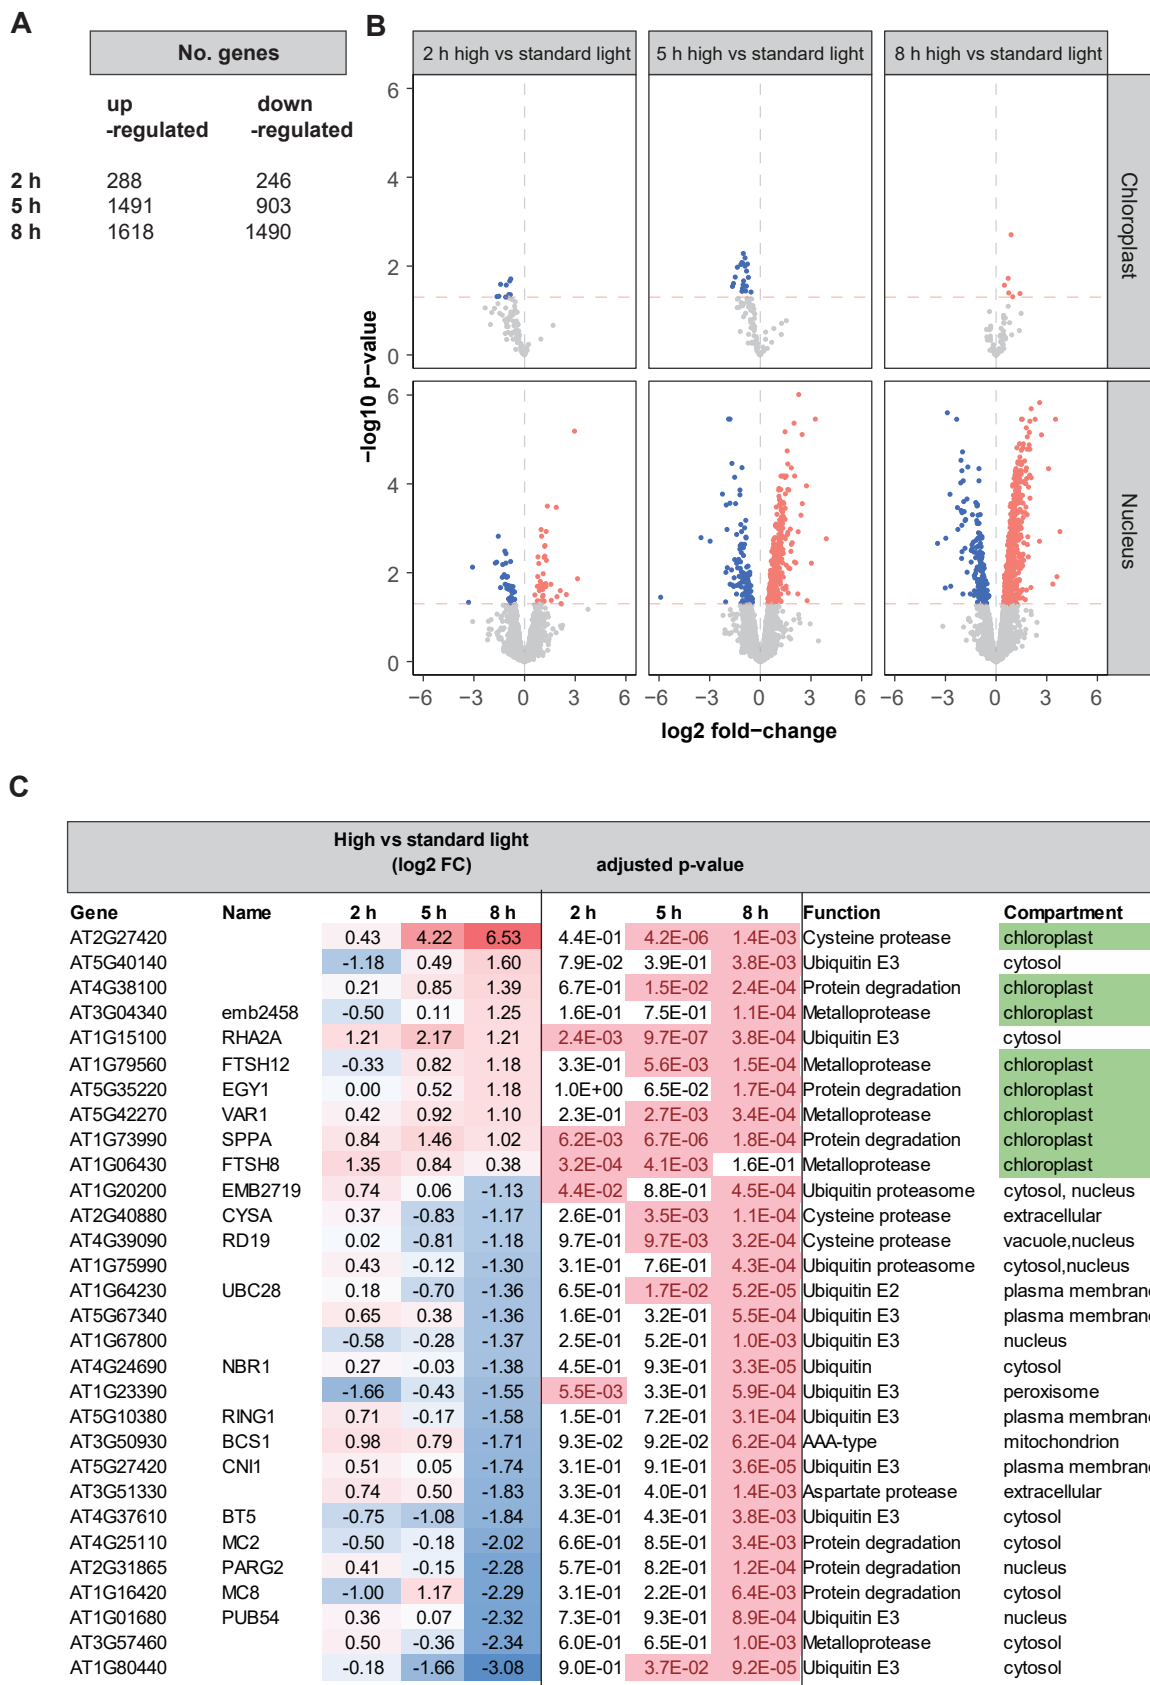

**Fig 2. High light induced changes to the transcriptome in Arabidopsis shoots.**

Gene expression differences were induced by high light treatment of Arabidopsis shoot tissue. **(A)** Numbers of differentially expressed genes (adjusted p-value < 0.05) at 2 h, 5 h and 8 h of high light treatment. **(B)** Volcano plots of differential gene expression (horizontal red line denotes adjusted p-value < 0.05) of nuclear vs chloroplast-encoded genes at 2 h, 5 h and 8 h of high light treatment. Red and blue dots denote up- and down-regulated genes, respectively **(C)** Differential expression of genes encoding proteases and components of the proteolytic machinery, notably proteases in plastids (colored green).

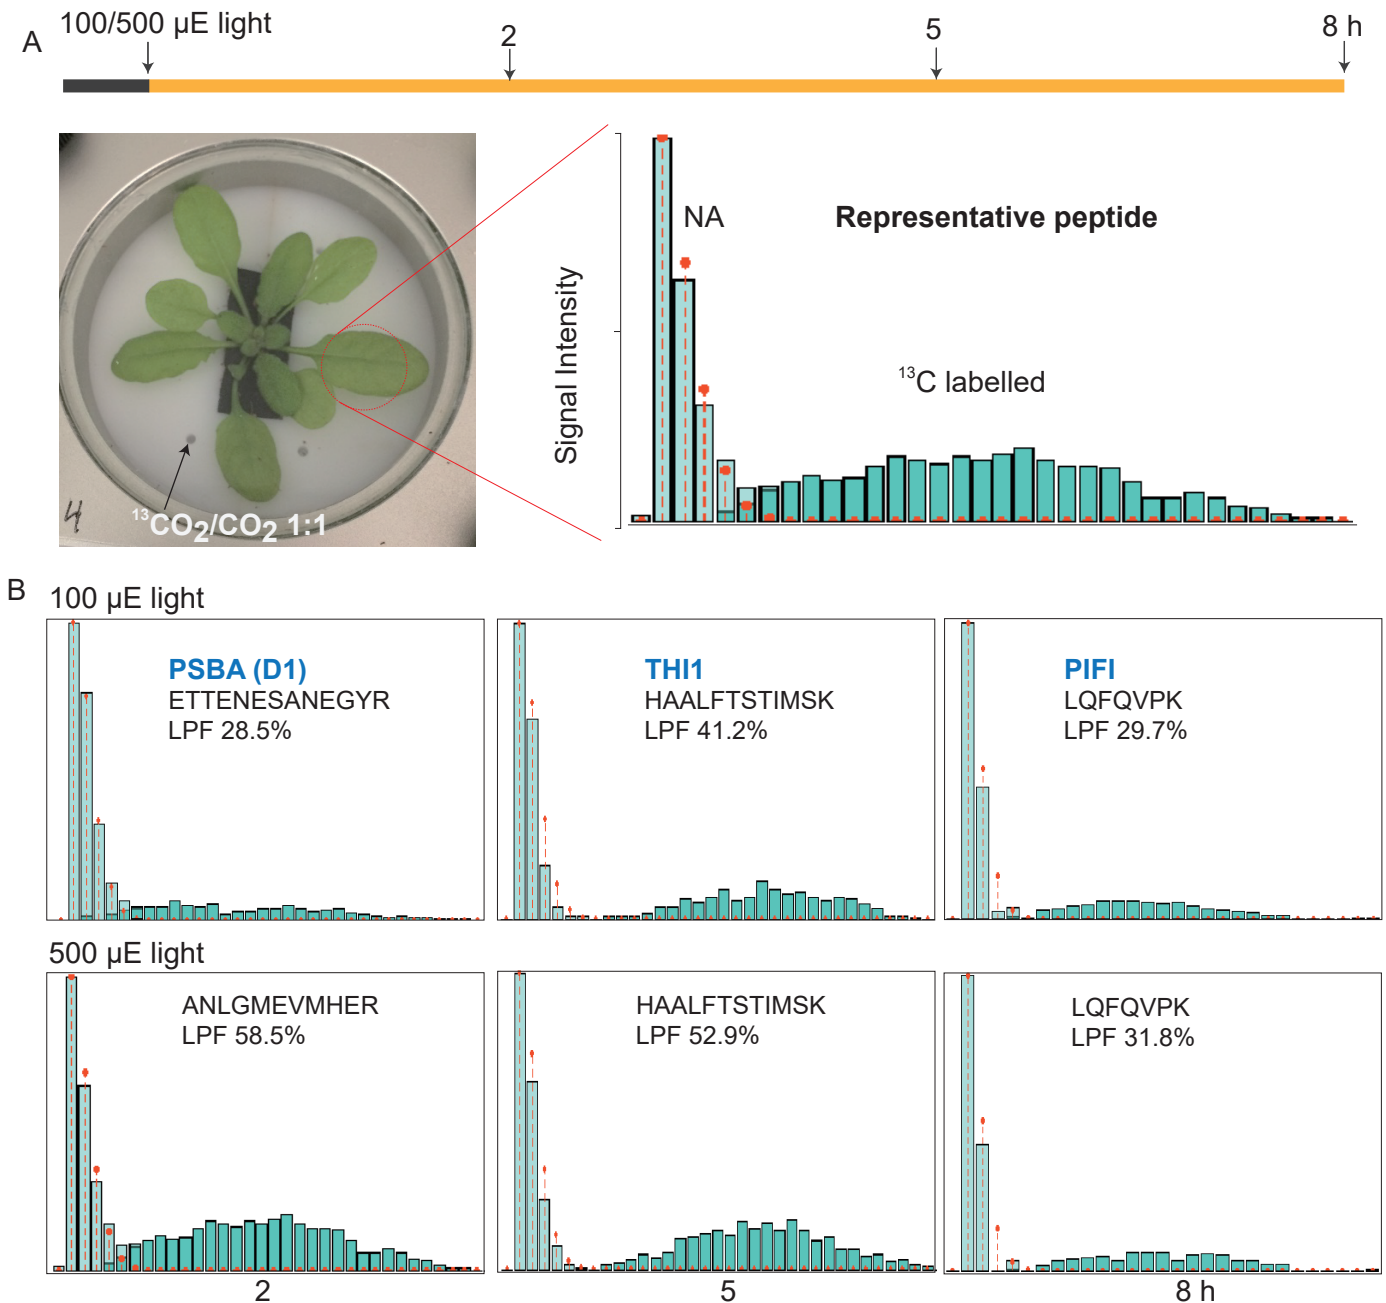

**Fig 3 Measurement protein turnover rates in Arabidopsis shoots by partial  $^{13}\text{C}$  labelling of the proteome.**

(A) Air containing  $^{13}\text{C}$  was supplied at the end of night to a sealed growth chamber with a transparent glass lid allowing efficient light entry. Total proteins extracted from labelled shoots were analyzed by peptide mass spectrometry. A representative mass spectrum of one peptide from labelled shoot shows the natural abundance (NA) population and the new peptide synthesised using  $^{13}\text{C}$  labelled amino acids. (B) The mass spectra and calculated percentage labelled peptide fraction (LPF) for peptides derived from PSBA (D1; ATCG00020), THI1 (AT5G54770) and PIFI (AT3G15840) after 2, 5 and 8 hours of  $^{13}\text{C}$  labelling are shown. The natural abundance (NA) population is coloured light green and the newly synthesized peptide population is coloured dark green in each case.

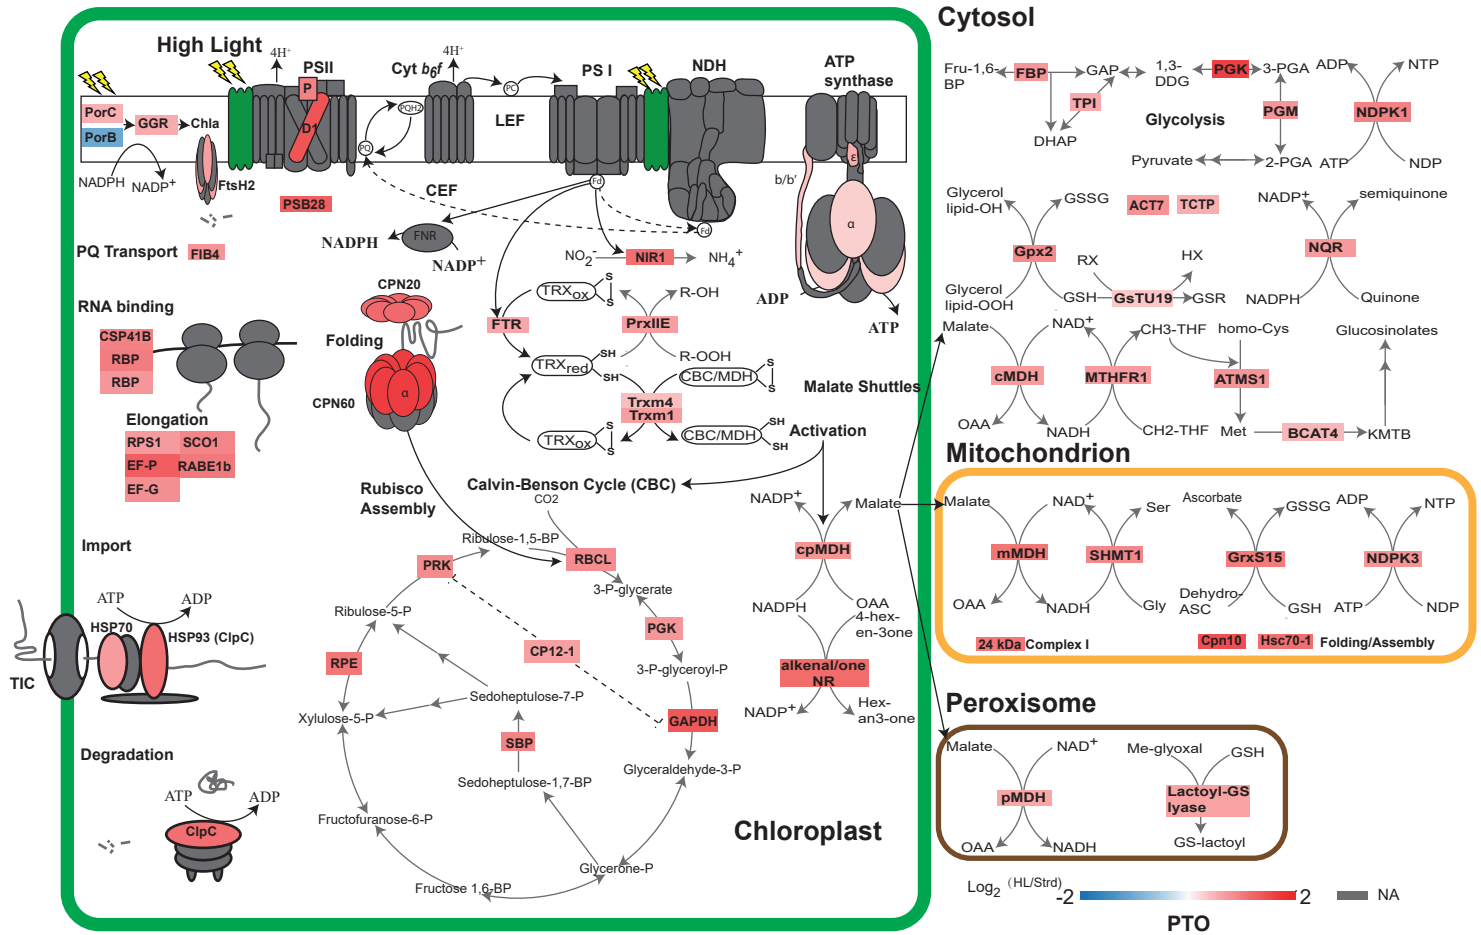

**Fig 4 Changes in protein turnover rates in response to high light treatment.**

Changes in protein degradation rate were shown as log<sub>2</sub> fold changes between high and standard light. For visualization, sixty-one proteins with annotated functions and localize in four major cellular compartments *i.e.* chloroplast, cytosol, mitochondrion and peroxisome were extracted from the set of 74 proteins with significant changes in rate. Protein subunits in photosynthetic complexes, import apparatus, chaperonin and protease were coloured according to the values of log<sub>2</sub> fold changes (**Data S4**). Protein subunits with non-significant changes or non-available data were coloured grey.

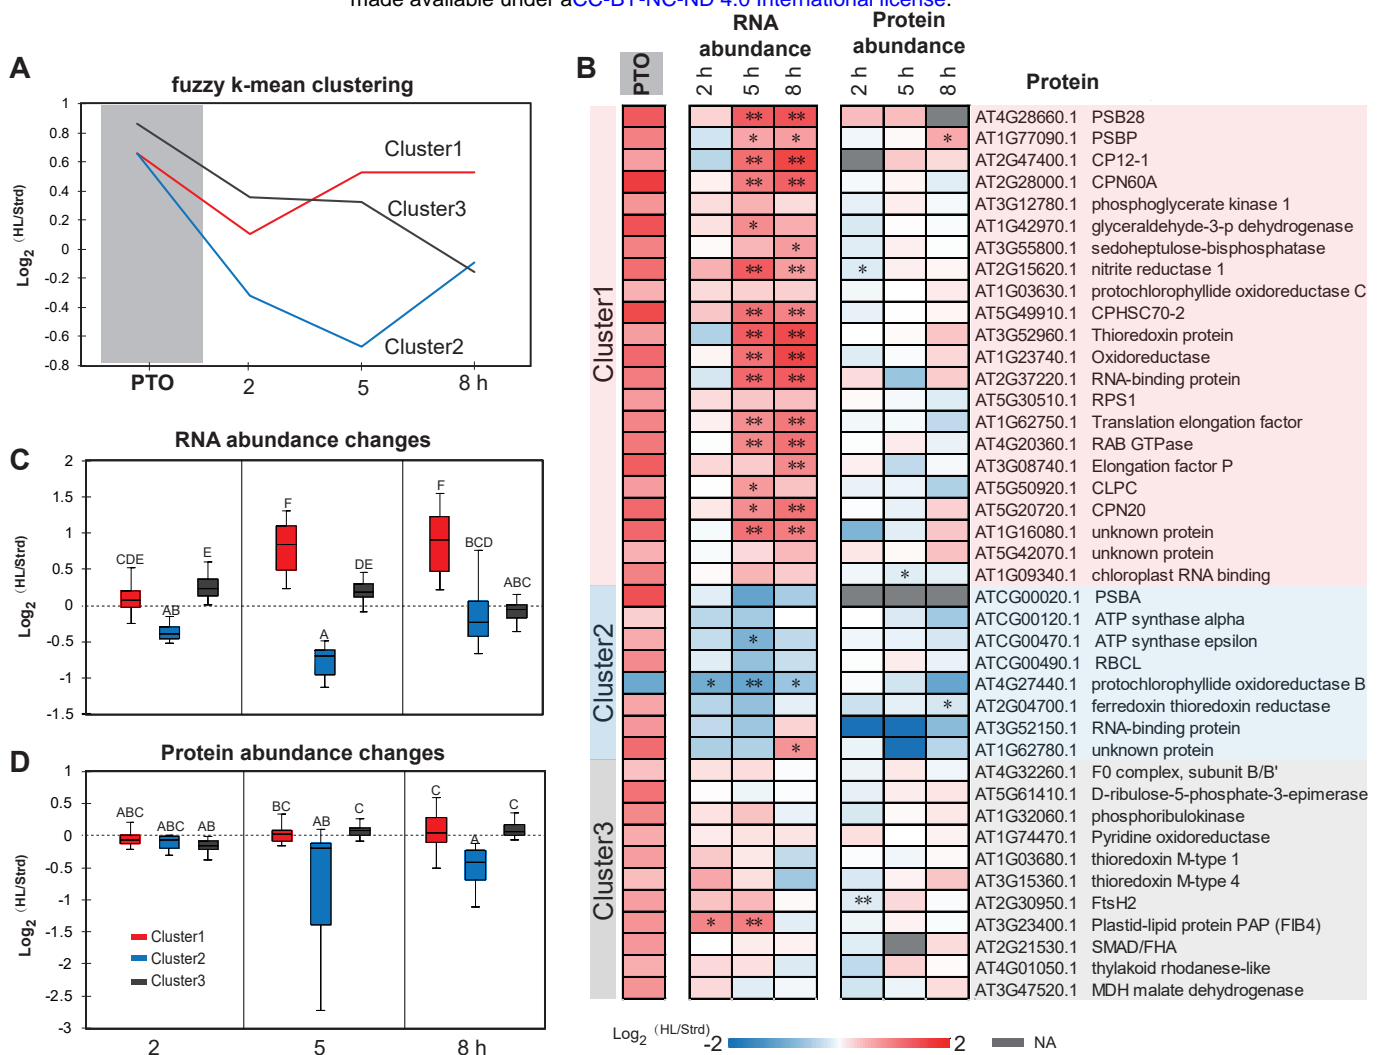

**Fig 5 Changes in transcript and protein abundance for proteins with significant changes in protein turnover rate during high light treatment.**

Based on patterns of protein degradation and transcript changes, a fuzzy k-mean clustering method was utilized to cluster the 74 proteins with significant changes in protein turnover rate. Representative curves of the three clusters were plotted (A) and values of distance to centroid for specific proteins is provided in **Data S5**. Forty-one plastid proteins were extracted from the whole set to show their protein turnover rate alongside fold changes in transcript and protein abundance (B). Boxplots of changes in transcript (C) and protein abundance (D) of each cluster over the time course are shown. PTO; change in protein turnover rate.



FigS1

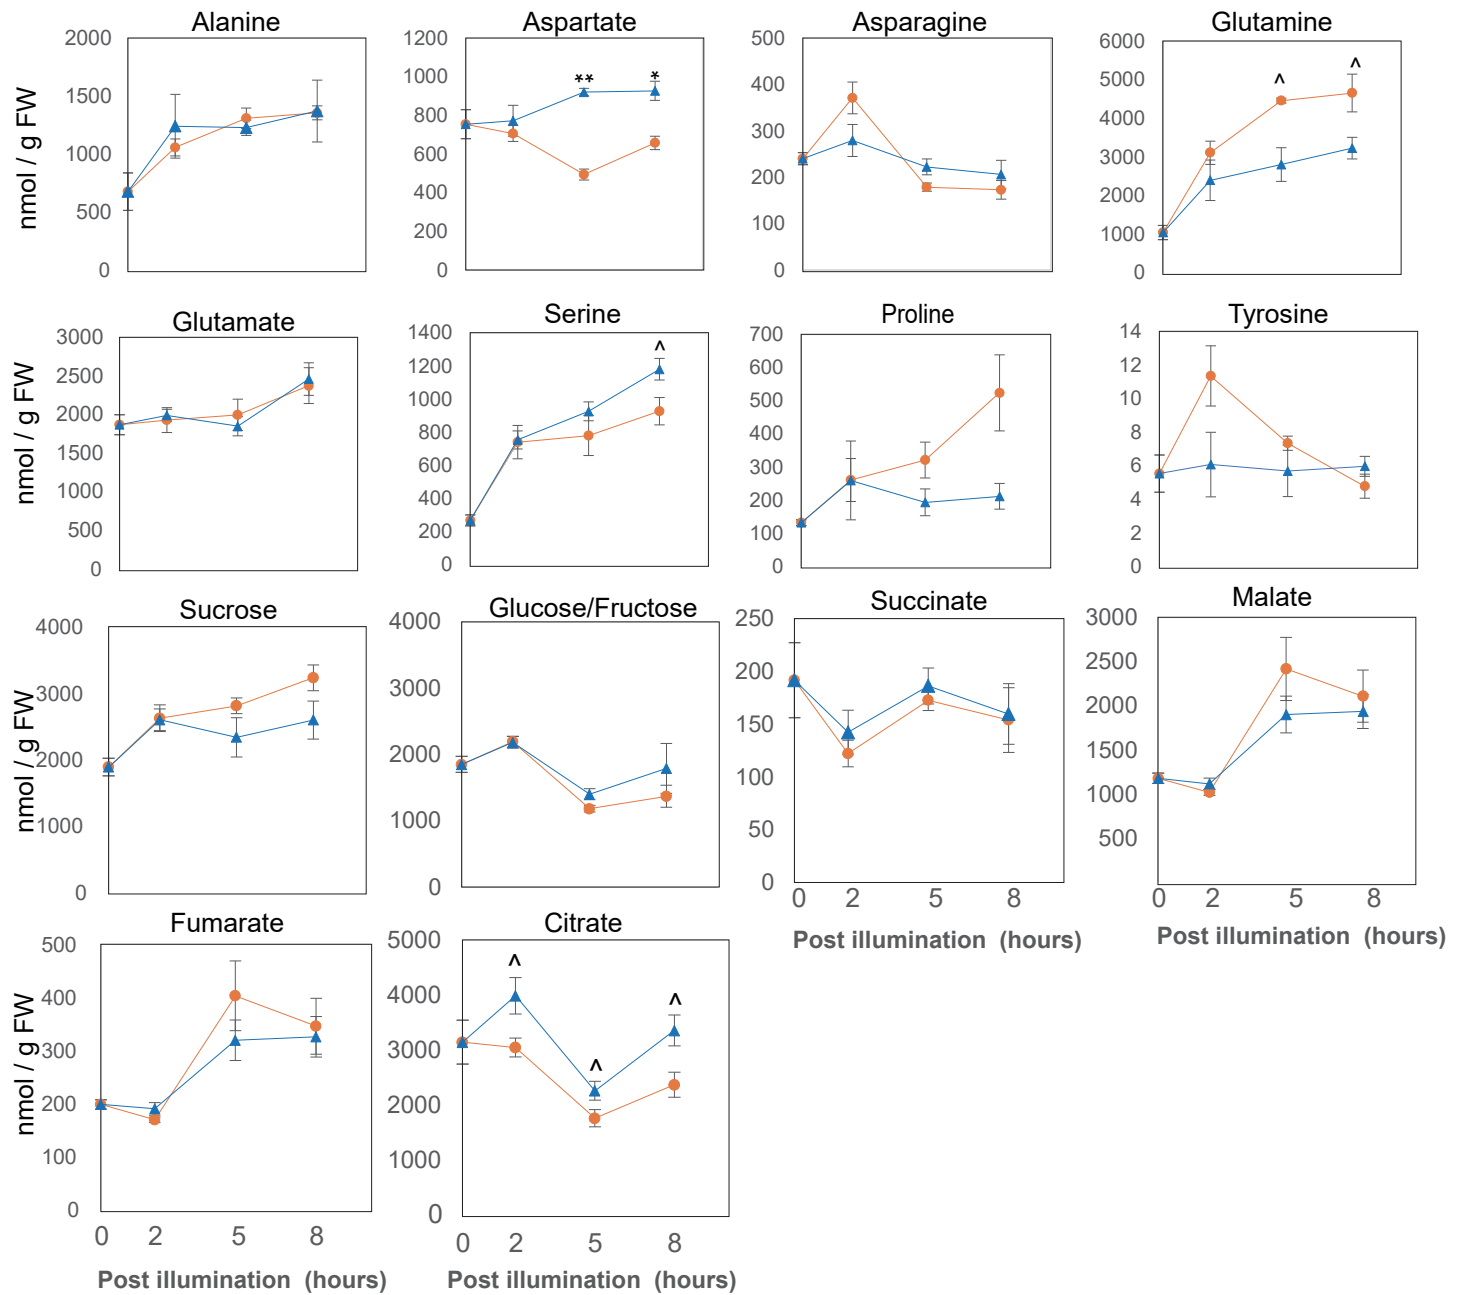

**Fig S1 High light induced changes in abundance of specific amino acids and organic acids.**

Specific amino acids (measured by LC-QQQ MS) and organic acids (measured by LC-Q-TOF MS) that increase in abundance in response to high light treatment. Error bars show standard errors (biological replicates n=3). Statistical significance tests were performed with a student's t test (\*\*P<0.01, \* P<0.05, ^ P<0.1).

## FigS2

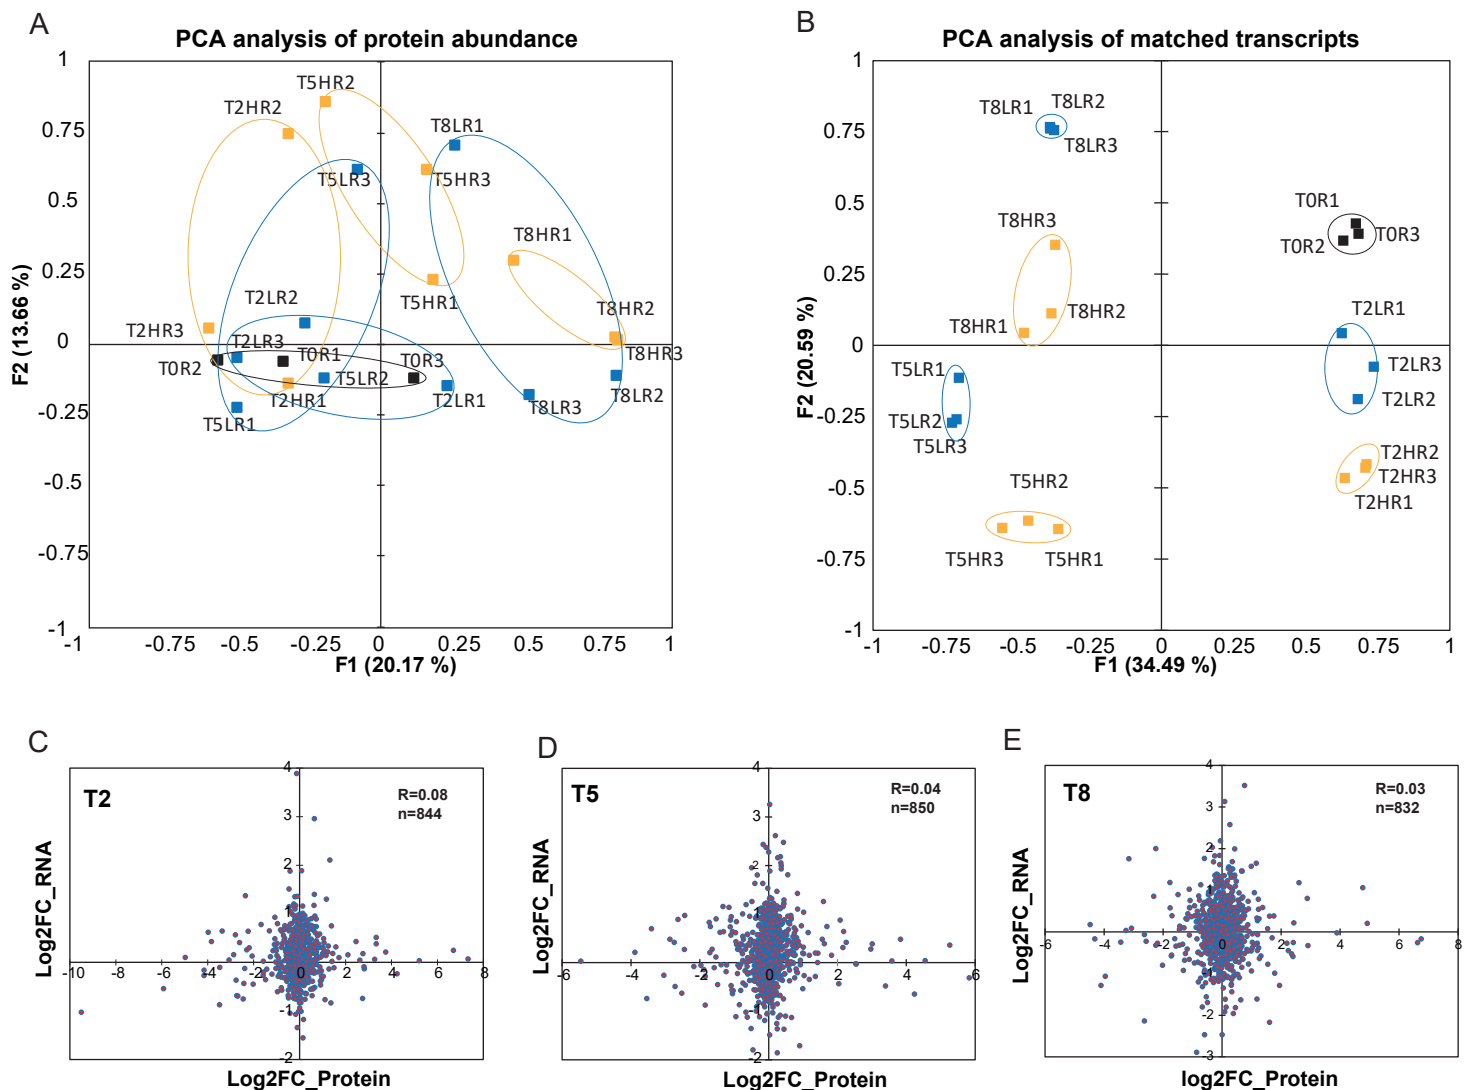

### Fig S2 Principal components analysis and correlations of protein and mRNA abundance showing the relationship between transcriptional responses and protein abundance in standard light and high light conditions.

PCA analysis for 370 proteins with measured transcript abundance (DataS1) and protein abundance (DataS2) in the dark (black), standard (blue), and high light (yellow) conditions. Scatterplots display the relationship between log<sub>2</sub> fold-change in protein abundance (x-axis) and mRNA abundance (y-axis), in response to high light. Pearson's  $r$  was calculated to quantify their correlation at 2h (T2), 5h (T5) and 8h (T8) (C-E).

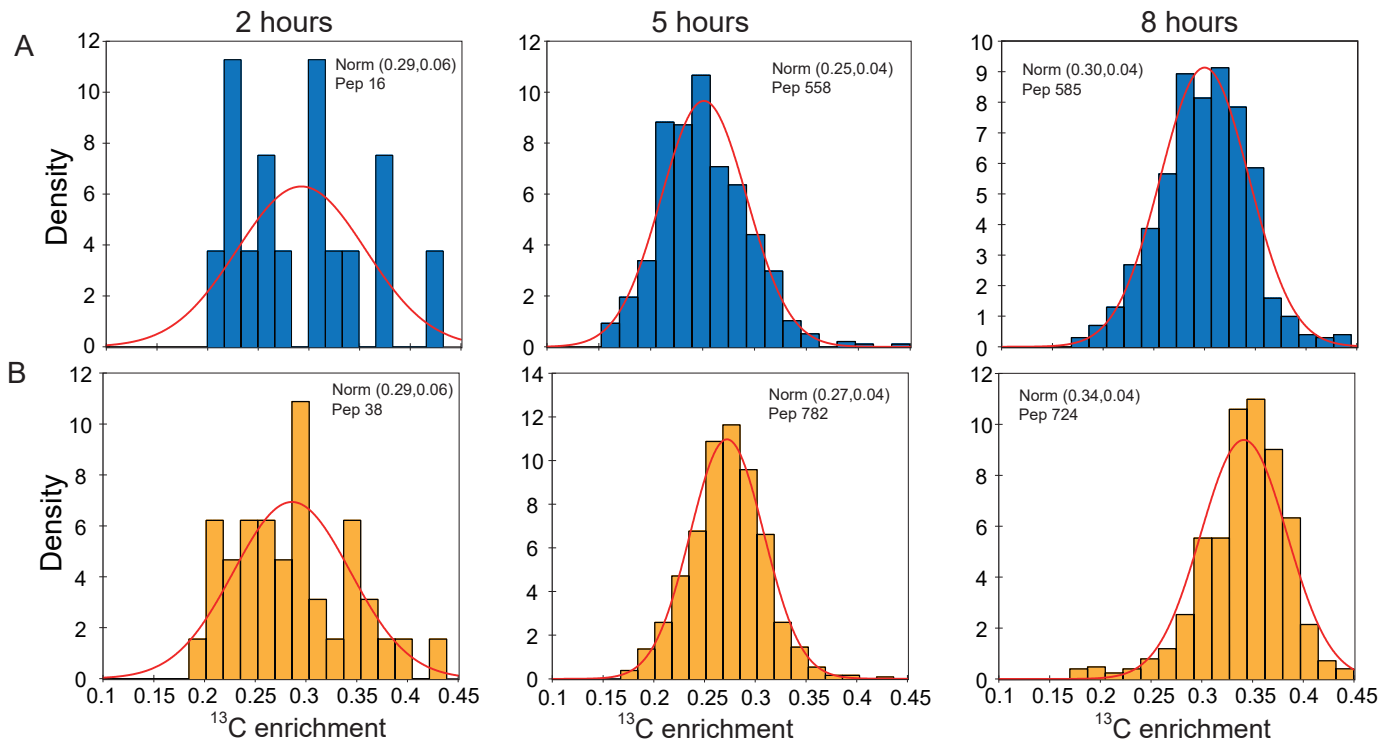

**Fig S3  $^{13}\text{C}$  enrichment level of the heavy labelled  $^{13}\text{C}$  peptide population under standard (blue) and high light (yellow) conditions.**

The calculated  $^{13}\text{C}$  enrichment level for all peptides identified under each condition from the progressive labelling experiments combined. In each histogram, the bars are the actual peptide number, the median and standard deviation are shown as a plotted red line normal distribution (norm). The number of unique peptides (pep) included in each analysis is shown.
